1 **Manuscript title**

2 Replication fork collapse at a protein-DNA roadblock leads to fork reversal, promoted by the RecQ  
3 helicase

4 **Short title**

5 RecQ promotes replication fork reversal

6 **Authors and Affiliation**

7 Georgia M. Weaver<sup>1</sup>, Karla A. Mettrick<sup>1</sup>, Tayla-Ann Corocher<sup>1</sup>, Adam Graham<sup>1</sup>, Ian Grainge<sup>1\*</sup>

8 <sup>1</sup>School of Environmental and Life Sciences, University of Newcastle, Callaghan, NSW, Australia

9

10 \*Ian Grainge, School of Environmental and Life Sciences, University of Newcastle, Callaghan, NSW,  
11 Australia, Tel: +61 2 4921 7238, [ian.grainge@newcastle.edu.au](mailto:ian.grainge@newcastle.edu.au) (IG)

12 Conceptualization, K.M. and I.G.; Methodology, I.G., and K.M.; Investigation, G.W., K.M, T.C, A.G.,  
13 Writing – G.W. K.M. and I.G.; Review & Editing, G.W., K.M., A.G. and I.G.; Funding Acquisition, I.G.;  
14 Supervision, K.M. and I.G.

15 **Keywords**

16 DNA replication; homologous recombination; RecQ; RecG; helicase; replication fork reversal

17

18

19

20

21

## 22 **Abstract**

23 There are numerous impediments that DNA replication can encounter while copying a genome, including the  
24 many proteins that bind DNA. Collapse of the replication fork at a protein roadblock must be dealt with to enable  
25 replication to eventually restart; failure to do so efficiently leads to mutation or cell death. Several prospective  
26 models have been proposed that process a stalled or collapsed replication fork. This study shows that replication  
27 fork reversal (RFR) is the preferred pathway for dealing with a collapsed fork in *Escherichia coli*, along with  
28 exonuclease activity that digests the two nascent DNA strands. RFR moves the Y-shaped replication fork DNA  
29 away from the site of the blockage and generates a four-way DNA structure, the Holliday junction (HJ). Direct  
30 endo-nuclease activity at the replication fork is either slow or does not occur. The protein that had the greatest  
31 effect on HJ processing/RFR was found to be the RecQ helicase. RecG and RuvABC both played a lesser role, but  
32 did affect the HJ produced: mutations in these known HJ processing enzymes produced longer-lasting HJ  
33 intermediates, and delayed replication restart. The SOS response is not induced by the protein-DNA roadblock  
34 under these conditions and so does not affect fork processing.

## 35 **Author Summary**

36 To transfer genetic material to progeny, a cell must replicate its DNA accurately and completely. If a cell does  
37 not respond appropriately to inhibitors of the DNA replication process, genetic mutation and cell death will  
38 occur. Previous works have shown that protein-DNA complexes are the greatest source of replication fork  
39 stalling and collapse in bacteria. This work examines how the cell deals with replication fork collapse at a  
40 persistent protein blockage, at a specific locus on the chromosome of *Escherichia coli*. Cells were found to  
41 process the DNA at the replication fork, moving the branch point away from the site of blockage by replication  
42 fork reversal and exonuclease activity. Our data indicate that it is the RecQ helicase that has the main controlling  
43 role in this process, and not the proteins RecG and RuvABC, as currently understood. RecQ homologs have been  
44 shown to be involved in replication fork processing in eukaryotes and their mutation predisposes humans to  
45 genome instability and cancer. Our findings suggest that RecQ proteins could play more important role in  
46 replication fork reversal than previously understood, and that this role could be conserved across domains.

47

48

## 49 **Introduction**

50 During DNA replication, the replication machinery (replisome) can arrest due to impediments on the DNA such  
51 as lesions or nucleoprotein blockages. Removal of bound proteins that the replisome itself fails to displace can  
52 be carried out by accessory helicases: in *E. coli* these are Rep, UvrD and/or DinG (1, 2). However, even with the  
53 full complement of these helicases, protein roadblocks are still found to be the most common obstacle to  
54 replisome progression, especially RNA polymerase (3). Encounter with a protein roadblock can lead to the  
55 dissociation of the replisome, and the frequency with which this happens is indicated by the central role of  
56 PriA/PriC restart pathways in bacterial cell viability (4). If the blockage is not removed, DNA replication is not  
57 able to continue to completion and the cell will not survive. The processing of these stalled forks is likely to be  
58 relatively frequent with most or all replisomes predicted to stall during the cell cycle (5, 6). Bacterial replisome  
59 dissociation has recently been reported to occur at a frequency of about 5 events per replisome, per cell cycle  
60 (7).

61 The DNA at a replication fork that has stalled upon encounter with a protein block can be processed by a number  
62 of possible pathways. Endonucleases can cut the forked DNA, producing a double strand break, followed by  
63 homologous recombination that restores DNA integrity (8). Alternatively, exonucleases can act to degrade the  
64 nascent leading and lagging strands, moving the Y-shaped branch point away from the site of blockage (9).  
65 Finally, replication fork reversal (RFR) can occur, whereby the leading and lagging nascent strands separate from  
66 their respective template strands and anneal to each other, concurrent with the two template strands also re-  
67 annealing (Reviewed in (10)). This leads to the formation of a four-way DNA structure called a Holliday junction  
68 (HJ) that is the substrate for proteins in homologous recombination pathways. This HJ has one arm that has free  
69 DNA ends that itself can be acted upon by exonucleases whilst the other 3 arms are continuous DNA.

70 DNA breakage or the recruitment of RecA to ssDNA at the stalled fork may lead to SOS induction (11). However,  
71 the SOS response is only expected to be a major influence in incidences of prolonged DNA damage, high levels  
72 of unresolved ssDNA and when the recombination pathways are ineffective at processing blocked forks  
73 (reviewed in (12)). RecA acts in the SOS response as a co-protease to cleave the LexA repressor, inducing SOS  
74 (reviewed in (13)). The RecA protein has been proposed to play a role in RFR, employing its strand exchange  
75 capacity; this is most readily explained as a RecA filament, bound to ssDNA on the lagging strand template of a

76 replication fork, which catalyses invasion into the leading strand duplex, displacing the nascent strand and  
77 forming a reversed fork (14). RecA-mediated RFR seems to occur only under specific conditions and is restricted  
78 in the presence of the single-stranded DNA binding protein (SSB) (15-17). Other proposed mechanisms that lead  
79 to RFR in bacteria, including the involvement of the homologous recombination protein RecA (14), are positive  
80 supercoiling ahead of the replication fork (18) and a number of possible helicase/translocase proteins including  
81 the branched DNA structure binding proteins, RuvAB and RecG (8, 19-21).

82 The DNA binding protein RuvA has high specificity towards branched DNA structures and loads the hexameric  
83 RuvB onto this DNA to perform the helicase and branch migration activities of the complex (22). When the  
84 endonuclease RuvC is also present, the complex is able to resolve the HJ as well as migrate it (23). The  
85 monomeric superfamily 2 (SF2) helicase and nucleic acid translocase, RecG, has been shown to be able to  
86 migrate HJs but can recognise a wider range of substrates than RuvA. RecG binds dsDNA and has been shown to  
87 unwind HJs, D-loops, R-loops and partial fork structures (reviewed by (24)). RecG has a wedge domain that  
88 confers its ability to bind to these DNA structures at the ssDNA branch point and two helicase domains that drive  
89 the unwinding as the protein translocates (25, 26). The growing evidence for the role of RecG in RFR and the  
90 finding that RuvABC-mediated RFR is only required in the absence of certain replisome components has  
91 subsequently meant RecG has replaced RuvAB as the major protein implicated in RFR (21, 27, 28). It has,  
92 therefore, been suggested RuvAB may only be required to branch migrate the HJ once RecG has performed the  
93 initial RFR (21, 29).

94 RecQ helicases, first identified in *E. coli* but conserved from bacteria to humans, are monomeric members of the  
95 SF2 superfamily (30-32). RecQ can initiate unwinding from a 3' ssDNA overhang, dsDNA ends, or from internal  
96 dsDNA (33-35). RecQ is a multifunctional helicase with roles in homologous recombination and suppressing non-  
97 homologous or illegitimate recombination. RecQ has been shown to act with TopoIII as a mechanism for  
98 changing catenation of DNA, to counteract illegitimate recombination events and to resolve converging  
99 replication forks (36, 37). During homologous recombination the helicase is predominantly associated with the  
100 RecFOR recombination pathway employed to process ssDNA gaps in the DNA commonly caused by UV  
101 irradiation (38, 39). In this pathway, RecQ translocates along the ssDNA gap and unwinds dsDNA, further  
102 enlarging the single stranded region so that other proteins can gain access to the DNA damage, including the  
103 RecFOR proteins that can then load RecA. *In vitro* analysis of the activity of the human RecQ helicases BLM and

104 WRN on model fork structures determined that they are both able to reverse forks into HJs (40, 41). However,  
105 *E. coli* RecQ is yet to be implicated in RFR *in vivo*. Interestingly, BLM and WRN can also promote the opposite  
106 reaction, un-reversing HJs back into forks (42). Another human RecQ homologue, RECQ1, has been shown to be  
107 important *in vivo* for the restart of replication forks that have been reversed and catalyses restoration of forks  
108 from their reversed state (43).

109 One of the major impediments to studying RFR *in vivo* has been the combination of a large chromosome and a  
110 rapid replisome: *E. coli* contains a genome of ~4.6 Mbp and the replisome moves at a rate close to 1kb/s (4). A  
111 system has been developed whereby a site-specific road block to DNA replication can be induced at a known  
112 position in the chromosome using a transcriptional repressor (TetR) bound to an array of operator sites within  
113 the *E. coli* chromosome (44, 45). Addition of a temperature sensitive allele of the replicative helicase (DnaBts)  
114 allows the rapid inactivation of the replisome across a population of cells, and the replication forks are processed  
115 by the cell within 5 minutes (44). Furthermore, the disappearance of the forked DNA structure from the array  
116 region coincided with the visualisation of HJs upstream of the array suggesting RFR had taken place in a sizeable  
117 proportion of cells (44). The disappearance of Y-shaped DNA will be used here as a definition of replication fork  
118 collapse; whether or not this is accompanied by partial or complete dissociation of the replisome is unknown.  
119 The regression of the replication fork away from the site of DNA damage or protein block allows repair proteins  
120 or accessory helicases to access the DNA and resolve the problem. The upstream HJ that is formed may be  
121 processed in a recombination-dependent or independent manner to restore a replication fork (reviewed by  
122 (10)). If the blockage is removed, replication is able to restart using the reformed fork structure onto which  
123 replisome reloading takes place (45), most likely in a PriA-dependent manner. Indeed, replication was observed  
124 to restart and proceed through the array in the vast majority of cells within 5 minutes of the addition of release  
125 of the block by addition of anhydrotetracycline.

126 In this report a site-specific replication block was established and characterised at the *lac* locus, approximately  
127 midway round the right replicore on the *E. coli* chromosome. A *dnaBts* allele was introduced to be able to  
128 trigger replication fork collapse by shifting to a non-permissive temperature. This site-specific replication  
129 blockage system was used to examine the process of RFR, and the relative contributions of candidate proteins.  
130 RFR is seen to occur as a major pathway used in cells to deal with a persistent roadblock to replication, with little  
131 or no evidence for endonuclease action at the fork. Some exonuclease activity is seen as well, that could either

132 be from action directly at the Y-shaped fork, or at the HJ produced by RFR. Deletion of *recQ* is seen to have the  
133 greatest effect on RFR with the process being highly inefficient in its absence, while both *ruvABC* and *recG* play  
134 a more minor role in RFR. However, the data suggest that RecG is involved in migrating the HJ formed by RFR  
135 back into a forked DNA structure that can be used for replication restart; in the absence of RecG HJs are much  
136 more prominent and are seen to persist. The induction of the SOS response was only observed to begin after 4  
137 hours of replication fork blockage, implying that it does not affect fork processing during the standard  
138 experimental timeframe used here.

## 139 **Results**

### 140 **Visualising replication fork reversal by inducing replisome collapse**

141 Previous work has established that a fluorescent repressor/operator system (FROS) using an array of *tetO*  
142 sequences integrated 16kb anticlockwise from *oriC* can block replication when the cognate repressor (TetR-YFP)  
143 is overproduced (44, 45). In this study a similar *tetO* array is utilised, inserted at the *lac* region roughly half-way  
144 between the origin and the terminus on the clockwise replicore. To verify that the roadblock was functional at  
145 the new position a set of growth experiments were carried out to determine whether replication could be  
146 blocked efficiently across the population, and whether this blockage was fully reversible (Fig. 1A). The induction  
147 of TetR-YFP with arabinose for 2 hours at 30°C resulted in the vast majority of cells (98%) containing one  
148 fluorescent focus per cell, determined microscopically (Fig. 1A). Cells with a single focus, representing the *tetO*  
149 array, have not duplicated the array region. When replication is not blocked in the unsynchronised culture, there  
150 is a mixed population of cells with one, two and sometimes more than two foci. A predominance of cells with a  
151 single focus point indicates replication has been arrested across the population, and is used in subsequent  
152 experiments as an indication that replication blocking has been successfully established prior to further  
153 experimentation (44, 45). The viability of these cells following blockage of replication was examined by plating  
154 cultures on LB agar and the colony forming units were determined. Cells that had been grown with arabinose to  
155 induce the DNA replication roadblock had ~1000-fold decrease in viability compared to untreated cells (Fig. 1B).  
156 To assess whether the established replication block could be removed to allow the resumption of replication,  
157 anhydrotetracycline (AT) was added to blocked cells and cultures were reanalysed after a 10 minute period. 80%  
158 of the cells now contained two or more fluorescent foci, indicating that the array had been duplicated and that

159 the two copies had segregated from each other (Fig. 1A). Given the position of the array, the 10 minute AT  
160 exposure does not allow time for a newly formed fork to start from *oriC* and progress to the array position. Thus,  
161 the multiple foci are most likely produced exclusively from restarted forks. The viability of these cells was  
162 restored to initial untreated levels, confirming that replication was able to restart throughout the population  
163 (Fig. 1B). These results confirm that the *tetO* array, incorporated at *lac*, is an effective blockage to replication  
164 when the repressor is overproduced, and that the roadblock is reversible with addition of AT.

165 *dnaBts* was incorporated into the *tetO* array-carrying strain and assessed in comparison to a WT strain for its  
166 ability to block and restart replication (Fig. 1C, 1D). It has recently been proposed that the replication fork  
167 present at the TetR-YFP roadblock is not stable but has a half-life of 3-5 minutes (44). An equilibrium exists  
168 between forks that are stalled at the block and ones that have collapsed and are being processed and will  
169 subsequently restart leading to their collision with the replication roadblock once again. DnaBts is utilised here  
170 to ensure the synchronous dissociation of the replisome across the entire population and to provide a regulatory  
171 tool where replication restart is dependent on DnaBts reactivation. The incorporation of *dnaBts* did not alter the  
172 ability of the replication roadblock to function at permissive temperature, and the results were identical to the  
173 WT strain (Compare Fig. 1A to Fig. 1C); following overproduction of the TetR-YFP repressor 98% of cells had a  
174 single fluorescent focus and viability was decreased over 1000 fold. Addition of AT, to release the replication  
175 roadblock, led to the rapid restart of replication with 80% of cells containing 2 or more foci after 10 minutes,  
176 and a complete recovery of viability.

177 Following validation of the replication block in both strains, the effect of a shift to 42°C, a non-permissive  
178 temperature for DnaBts, was investigated. Cells were grown at 30°C and replication was blocked by  
179 overproduction of TetR-YFP as before. Each strain was then transferred to 42°C for one hour, to inactivate DnaB  
180 in the temperature sensitive strain. The ability of DNA replication to restart in each strain was then compared  
181 by transferring cells back to the permissive temperature of 30°C for 10 minutes, with or without the addition of  
182 AT. In the WT strain a similar pattern was seen to cells grown only at 30°C; the majority of the population had a  
183 single fluorescent focus following the temperature shifts indicating replication was still being efficiently blocked,  
184 and addition of AT led to ~70% of cells showing two or more foci within 10 minutes of addition of AT  
185 demonstrating effective replication restart (Fig. 1A). Similarly, viability was almost fully recovered by addition of  
186 AT. Therefore, the temperature shift to 42°C had little noticeable effect upon the replication block or replication

187 restart in the WT strain. In the *dnaBts* strain the 1 hour at 42°C did not affect the integrity of the replication  
188 blockage as judged by the high proportion of cells with a single focus and the drop in viability when arabinose is  
189 present (Fig. 1C, 1D). Upon addition of AT when the cells were returned to 30°C viability was also seen to recover  
190 to WT levels. This demonstrates that transient inactivation of DnaBts is well tolerated and cells recover fully  
191 when returned to a permissive temperature and the replication blockage is removed. However, the proportion  
192 of cells with 2 or more foci after 10 minutes of AT treatment is much lower than seen with WT. This likely reflects  
193 the extra time this strain requires to restart replication that may involve the refolding of inactive DnaBts protein  
194 or the novel synthesis of the protein. It has been shown that the majority of locations on the *E. coli* chromosome,  
195 including *lac*, require 7-10 minutes to visibly segregate from the sister DNA following replication (46, 47). Thus,  
196 even a short delay in restarting replication in the *dnaBts* strain may be sufficient to prevent the replicated sister  
197 duplexes from separating from each other, within the resolution limit of the microscope.

198 The DNA structures present within each strain during the replication block experiment were visualised using 2-  
199 D neutral-neutral agarose gels (Fig. 2). DNA from each condition was extracted, digested and electrophoresed.  
200 A radiolabelled probe was used to detect either a 5.8 kb array region including 0.6 kb upstream from the  
201 beginning of the array, or a 3.3 kb region from 0.5 kb to 3.8 kb upstream of the array (Fig. 2). At 30°C, both the  
202 WT and *dnaBts* strains showed a strong, localised spot of Y-shaped DNA in the array region after the addition of  
203 arabinose, indicating replication fork blockage (Fig. 2A). With a shift to 42°C for an hour, persistent forked-DNA  
204 structures remained in the WT strain consistent with maintaining the equilibrium of blocked forks and fork  
205 turnover (Fig. 2A) (44). The additional hour of blockage and the temperature shift did not significantly alter the  
206 replication blockage in the array region of the WT strain. Quantification of the linear and forked DNA signals  
207 determined that ~60% of DNA was seen to be Y-shaped at 30°C; ~70% was as a Y-structure after the hour at 42°C  
208 (Fig. 2B). The region upstream of the array showed that upon replication blockage a clear signal for HJ and Ys  
209 could be seen (Fig. 2C), and the levels of these signals did not vary with changes in temperature in the WT strain,  
210 suggesting that the replication forks maintain a relatively constant fork turnover rate.

211 In contrast, the *dnaBts* strain displayed a vast decrease from ~50% to 12% in forked DNA signal at the array  
212 following the shift to 42°C (Fig. 2A and B). The non-permissive temperature for DnaBts induced the collapse of  
213 the replication fork and resulted in fork processing events, including RFR, moving the forks out of the array  
214 region, as visualised by the dramatic loss of Y-structured DNA. Upstream of the array HJ and Y-shaped signals



215 are seen at 30°C as with WT (Fig. 2C). After 1 hour at 42°C mostly linear DNA remained upstream suggesting that  
216 the reversed forks had been further processed, either by migration further upstream or by nuclease action (Fig.  
217 2C; Fig. S1); replisome reloading cannot occur in the *dnaBts* strain at 42°C explaining the difference compared  
218 to WT.

219 When the *dnaBts* cells were returned to the permissive temperature of 30°C for 10 minutes the forked DNA  
220 signal at the array increased above the level seen at 42°C, consistent with restoration of DnaB function, restart  
221 of replication and subsequent collision with the block (Fig. 2A). However, the amount of Y-shaped DNA was  
222 lower than the level seen prior to the shift to 42°C, possibly due to the time taken to reactivate/re-synthesise  
223 DnaB and then to restart the replication fork. This is in agreement with the microscopy data shown in Fig. 1.

#### 224 **Induction of the SOS response by persistently blocked replication forks begins after 4 hours**

225 It was possible that the SOS response may have been activated in these cells after prolonged replication fork  
226 stalling events (~2 hours), as used in this study. In order to address this concern, the timing and extent of SOS  
227 response was monitored in cells that had replication blocked (and released). *suIA* is a mid-stage gene in the SOS  
228 regulatory network with its activation occurring 5 minutes after UV irradiation, with a 100-fold increase in  
229 transcription once SOS is induced (48, 49). The *suIA* promoter was cloned to drive expression of the mCherry  
230 fluorescent protein, and this construct was inserted half way round the left replicore on the chromosome.  
231 mCherry fluorescence would be indicative of the *suIA* promoter activation and, therefore, SOS induction. The  
232 fluorophore fused to TetR in this strain was also changed from YFP to GFP to reduce spectral emission overlap  
233 with mCherry. mCherry fluorescence in cells was measured after 0, 2, 4, 6 and 24 hours of arabinose induction  
234 of the TetR-GFP roadblock using a microplate reader and visualised by fluorescence microscopy (Figure 3) to  
235 determine whether the SOS response is induced by a persistent replication fork blockage. This reporter *psuIA*-  
236 mCherry construct was also incorporated into both *recA* or *uvrD* strains as controls; in *recA* cells the SOS  
237 response cannot be induced, while in a *uvrD* mutant the SOS response cannot be repressed once induced.

238 SOS induction had not occurred 2 hours after the induction of the replication fork block in WT cells, as mCherry  
239 fluorescence was not detected by either microplate reader or microscopy (Figure 3A and B). However, blocked  
240 replication forks had been established across the cell population as indicated by the single GFP focus points in  
241 each cell (Fig. S2). Some evidence of SOS induction was observed at 2 hours in *uvrD* cells though not in *recA* (Fig.

242 S2). 4 hours after induction of the replication fork block, each strain still had a single focus across the population  
243 confirming replication could proceed through the array, and cells had begun to elongate (Fig.3 and Fig. S2). At  
244 this time point, some cells showed delocalised mCherry fluorescence by microscopy, and the population showed  
245 a slight increase in red fluorescence detected by the plate-reader (2250 RFU in WT cells, slightly lower than *uvrD*  
246 by 250 RFU, Fig. 3 and Fig. S2). This indicated that the SOS response was active in some cells. By 6 hours, the  
247 majority of the cell population were seen to display a red fluorescence signal, and correspondingly an RFU of  
248 7300 was detected using the plate reader (similar to *uvrD*). The fluorescence detected at 24 hours post fork-  
249 blockage had increased dramatically (22,000 RFU) though plasmid loss and cell death were observed alongside  
250 cells with increased mCherry intensity (Fig. 3). This result was similar to the *uvrD* 24-hour sample (Fig. S2). As  
251 expected, over the time course, no mCherry fluorescence was seen in any *recA* cells by microscopy (data not  
252 shown), and the plate reader detected under 1800 RFU of mCherry (Fig. S2), confirming that the SOS response  
253 is not induced in the absence of RecA. The effect upon SOS induction of releasing the replication roadblock by  
254 the addition of AT after 2 hours of fork blockage was also assessed. No observable SOS induction was seen 2, 4  
255 or 22 hours post AT addition in either WT, *uvrD*- or *recA*- strains (Fig. 3 and Fig. S2). This confirms that the SOS  
256 response is not induced by production of the replication roadblock within the first 2 hours, and thus the initial  
257 replication fork processing events observed are not influenced by the SOS response.

258 Replication fork processing and RFR can be induced across the population by a shift to the non-permissive  
259 temperature for the *dnaBts* strain, and this is observed to occur rapidly (44). Therefore, DnaBts can be utilised  
260 to collapse forks and monitor RFR events over time in a population of cells. We cannot rule out the possibility  
261 that prolonged exposure of *dnaBts* cells to 42°C following the establishment of the replication fork block will  
262 induce SOS. However, processing events seen at the early time points after 90 minutes of inducing the  
263 replication roadblock will not be influenced by SOS induction.

#### 264 **RFR is more dependent on RecQ than RecG or RuvABC**

265 To determine the contributions of various proteins to RFR at a nucleoprotein block *in vivo*, mutations in *recG*,  
266 *ruvABC* or *recQ* were introduced in the *dnaBts* strain containing the *tetO* array. Once the formation of a  
267 replication blockage had been verified by fluorescence microscopy, the cells were shifted from 30°C to 42°C to  
268 inactivate DnaBts. The previous experiment established that a strain carrying DnaBts had the majority of its

269 blocked forks reversed out of the array within an hour at the non-permissive temperature (Fig. 2). To more  
270 closely investigate the timing of RFR, samples were taken at 15-minute intervals in both the *dnaBts* and *dnaBts*  
271 + helicase mutant strains at 42°C and the DNA structures present in the array region were analysed via 2-D gels.  
272 If the Y-structured DNA indicative of a blocked replication fork persists at the array region within one of the  
273 strains, it indicates that the mutation is affecting the cell's ability to process the replication fork. The region  
274 upstream of the array was also visualised to see if the observed levels of Y-structures at the array correlated  
275 with the presence or absence of upstream DNA structures. In *dnaBts* cells with replication blocked by addition  
276 of arabinose, a shift to 42°C resulted in a drastic loss in Y-structured DNA signal at the 15 minute time point; 15%  
277 Y-shaped DNA remained from the 50% seen initially (Fig. 4B). The DNA upstream was mostly linear with a low  
278 level of Y and HJ DNA, and remained so over the hour (Fig. S1, Fig. 2C).

279 Following the same procedure to block DNA replication in *dnaBts recG* cells, a strong Y-shaped forked DNA signal  
280 was observed indicative of the replication roadblock, but at a significantly lower amount than *dnaBts* (Fig. 4A  
281 and B). Upstream of the array a strong HJ signal is visible, and is reproducibly stronger than in other genetic  
282 backgrounds (Fig. 4C). At the permissive temperature for *DnaBts*, the steady turnover of forks and their  
283 processing and subsequent restart should be occurring, yet without RecG there is a marked accumulation of  
284 unresolved HJ signal, indicating a role for RecG in the processing of these HJs. Shifting the *dnaBts recG* cells to  
285 42°C resulted in a reduction in Y-DNA signal within the array region as fork-collapse occurs to an extent similar  
286 to that seen in WT (Fig. 4A); after 15 minutes, 20% of the signal was present as forked DNA in the array, which  
287 further reduced to 13% by an hour (Fig. 4B), levels that are slightly higher than seen for *dnaBts*. This was  
288 accompanied by the loss of HJ and Y-shaped signals upstream over the 42°C time-course (Fig. 4C), but this  
289 occurred more slowly than in *dnaBts* where by 60 minutes almost all the signal had disappeared (Fig. S1). It is  
290 plausible that the slightly reduced level of Y-shaped DNA seen at the array upon replication blockage is a result  
291 of a subtle alteration in the equilibrium between blocked replication forks at the array, and the collapsed forks  
292 undergoing processing. The higher level of HJ seen may reflect that RFR takes longer to be resolved in a *recG*  
293 mutant with DNA existing as a HJ for a longer time, even in the presence of RuvABC. It is noteworthy that the  
294 position of the HJ signal in the 2-D gels is that of a so-called "X spike", which is distinctive of a HJ made from two  
295 dsDNAs of full length. If degradation on one arm had occurred, or if the HJ was formed by homologous

296 recombination using a broken strand within this region, then it would migrate in the “cone signal” area and not  
297 as seen. The HJ is, therefore, distinctive of a RFR event.

298 The *dnaBts ruvABC* mutant produced a replication block at a similar level to *dnaBts* at 30°C (Fig. 4A). Inducing  
299 fork collapse at 42°C led to a rapid drop in Y-DNA signal as seen in *dnaBts* (Fig. 4B). However, after an hour at  
300 42°C a slightly higher percentage of DNA remained as a fork structure, 20% compared to 12% for *dnaBts*. The  
301 prominent HJ seen upstream in the *recG* mutant was not present in *dnaBts ruvABC* and the non-linear DNA  
302 structures that were present were largely processed in the course of the hour at 42°C, similar to *dnaBts* (Fig. 4C;  
303 S1). It is noteworthy that this processing of the upstream DNA appeared efficient even in the absence of RuvABC.

304 The greatest persistence of Y-shaped DNA following a shift to 42°C was seen in the *dnaBts recQ* mutant. Upon  
305 establishment of a replication block at 30°C, 65% of DNA was Y-shaped, a significantly larger proportion than in  
306 *dnaBts* (Fig. 4A and B). After 15 minutes at 42°C the DNA remained largely in the forked-DNA structure (Fig. 4A).  
307 Quantitatively, forked DNA now made up 44% of the total DNA, signifying that only a third of the initial Y-shaped  
308 DNA had been processed. The fork signal persisted even after an hour at 42°C, with 33% of the total DNA still  
309 being in a Y-structure (Fig. 4A and B) i.e. roughly half the initial Y-shaped DNA remained after 1 hour, compared  
310 to 23% of initial forks in *dnaBts* (Fig. 2B). Upstream of the replication block processing intermediates were  
311 present at all times; this could reflect that processing of the upstream DNA was also slower in *recQ* mutants, or  
312 that there was a constant low level of processing of the Y-shaped structures to generate more upstream signals  
313 that continued over the full hour (Fig. 4C). The slowed processing of the stalled fork could explain why a higher  
314 proportion of Y-structured DNA was initially seen at the array: it is the result of an alteration of the equilibrium  
315 between fork collapse/processing and restart similar to what was proposed for the RecG results above (Fig. 2B).  
316 The majority of processing of the Y-shaped DNA in these experiments occurs by RFR rather than direct nuclease  
317 cleavage of the Y-shaped DNA, as RecQ has no nuclease function. Following inactivation of DnaBts it has been  
318 seen that both ExoI and RecJ can contribute to degradation of the nascent DNA strands (50), and RecJ activity  
319 has been shown to be stimulated by RecQ activity that provides a suitable substrate (51). Therefore, inactivation  
320 of RecQ may inhibit processing that leads both to RFR and exonuclease digestion to yield Y-shaped structures  
321 upstream.

322 These findings demonstrated that *recG*, *ruvABC* and *recQ* mutants exhibit a diminished ability to reverse  
323 replication forks, implying that all three proteins are involved in RFR. It also implies that very little direct  
324 endonuclease digestion of the Y-shaped DNA occurs, as it is difficult to envisage this being restored to a stable  
325 Y-structure at the non-permissive temperature for DnaBts. However, the most extensive deficiency to RFR was  
326 seen in *dnaBts recQ* indicating that RecQ is key to the majority of RFR under these conditions.

### 327 **RecG and RuvABC act in a distinct pathway from RecQ to process stalled forks**

328 To determine whether RecG, RuvABC and RecQ act synergistically to perform RFR, we investigated strains with  
329 combinations of these gene knockouts. If these proteins act independently, the absence of multiple proteins  
330 should be an additive effect, and the signal indicative of forked DNA that accumulated in the array region during  
331 induction of the replication blockage will persist at a higher proportion than in any of the single mutants alone  
332 upon DnaBts inactivation.

333 In the *dnaBts recGrecQ* mutant, the proportion of forked-DNA at the array was significantly higher than in a  
334 *dnaBts* mutant; it remained at a high intensity in the array region 15 minutes after the shift to 42°C when it  
335 reduced to 37% from 64% (Fig. 5A and B). The intensity of this Y-DNA signal was unchanged at the 60-minute  
336 time point (37%, Fig. 5A and B). Therefore, 57% of the initial forks within the array region failed to be processed  
337 in the *dnaBts recGrecQ* mutant even after one hour, marginally more impaired than a *recQ* mutant. The HJs and  
338 Y-arcs detected upstream after the initial replication block (0 minutes) in *dnaBts recGrecQ* mutant included a  
339 prominent HJ signal, like those seen in a *recQ* mutant. Shifting the cells to 42°C resulted in a loss of the Y-DNA  
340 arc and a decrease in the HJ signal after 60 minutes, although they were still very prominent at 15 minutes (Fig.  
341 5C).

342 Analysis of the *dnaBts recQruvABC* strain bore a close resemblance to that of *dnaBts recGrecQ* and *dnaBts recQ*.  
343 Once shifted to 42°C the intensity of the forked DNA signal remained relatively high at both the 15- and 60-  
344 minute marks (Fig. 5A). 43% of the total DNA remained forked at the block site after 15 minutes with a small  
345 decrease to 35% by 60 minutes. Therefore, of the original Y-shaped signal 54% remained at 60 minutes (Fig. 5B).  
346 Upstream DNA signals were also akin to those seen in the *dnaBts recQrecG* mutant, as they were maintained at  
347 a high intensity upstream of the block once fork collapse was initiated and observed at 15 minutes, but became  
348 fainter after an hour (Fig. 5C). The similarity in the signals seen in both *recGrecQ* and *recQruvABC* could mean

349 that that RecG and RuvABC contribute equally to RFR, or could act in the same pathway together. However,  
350 RecQ's contribution to RFR appears to far outweigh either RecG or RuvABC.

351 When *dnaBts recGruvABC* cells were grown at 30°C and the replication roadblock was induced, ~45% of the total  
352 DNA was seen to be Y-shaped. This percentage is similar to that seen with *dnaBts recG* (46%), and is lower than  
353 seen with other strains, possibly reflecting a longer lived HJ intermediate in the absence of RecG. Upon shift to  
354 42°C the signal strength of the forked DNA decreased to ~10% at 15 minutes and by an hour a further decline to  
355 7% Y-DNA occurred (Fig. 5A and B). The non-linear DNA structures detected in the *dnaBts recGruvABC* mutant  
356 upstream of the block dissipated over time becoming faint after 15 minutes and almost disappeared by 60  
357 minutes (Fig. 5C). The signal intensity seen in this region more closely resembled that of *dnaBts recG* and *dnaBts*  
358 *ruvABC* rather than maintaining the stronger signals of *dnaBts recGrecQ* and *dnaBts recQruvABC*. Both RecG and  
359 RuvABC have several reported functions, some of which overlap. The 2-D gel profiles of the double *recGruvABC*  
360 mutant closely resembled that of each single mutant, suggesting that they did not have an additive effect, and  
361 may be working in the same pathway.

362 Finally, the effect of the absence of all three proteins were analysed collectively via a *dnaBts recGrecQruvABC*  
363 mutant. Based on the previous trends, it was expected that the triple deletion mutant should resemble either  
364 double mutant containing *recQ*. Indeed, 60% of the initial Y-shaped DNA signal remained after 60 minutes at  
365 42°C (Fig. 6). Additionally, the signal patterns detected upstream over the hour of fork collapse in the triple  
366 mutant were consistent with the single and double mutants, where the non-linear DNA signals were strong at 0  
367 and 15 minutes but reduced by an hour (Fig. 6). This again verified that RecQ contributes greatly to RFR.

#### 368 **Restart of replication is impaired in a *recG* mutant**

369 It has been previously established that the TetR-YFP replication roadblock can be relieved with the addition of  
370 AT, resulting in the restart of replication (Fig. 1). The addition of AT for 10 minutes following 2 hours of replication  
371 roadblock restored viability to levels seen in isogenic cells that never had arabinose to induce replication stalling.  
372 2-D gel analysis of this replication resumption in *dnaBts* saw the disappearance of forked DNA (Fig. 7), leaving  
373 solely linear DNA, in both the upstream and array regions after 10 minutes AT exposure, which correlates with  
374 the restoration of viability (Fig. 1). The absence of forked DNA meant that all the intermediates previously seen  
375 (Fig. 2) had been processed within this 10 minute period. The most likely explanation is that replication restart

376 had occurred across the population of cells. Importantly, once the cells had undergone the temperature shift to  
377 42°C for one hour and then back to 30°C to allow re-establishment of the replisome, again only linear DNA  
378 resided in the 2-D gels after 10 minutes AT exposure (Fig. 7A) (compare to signals in Fig. 2 where AT was not  
379 added). As previously noted (Fig. 1) the counting of cell numbers with multiple foci for *dnaBts* revealed that  
380 there was a slower release of the block under these conditions, however, this delay wasn't seen in the 2-D gels.  
381 This suggests that the replication forks have restarted within 10 minutes and the array has been copied, but  
382 there has not been sufficient time for the two daughter copies to segregate from each other.

383 The *dnaBts recG* strain produced extremely prominent HJ and Y-shaped signals upstream of the replication  
384 roadblock (Fig. 4C). The ability of these cells to restart replication was examined by removal of the TetR block by  
385 addition of AT for 10 minutes. It was seen that substantial levels of Y-shaped DNA and HJ were present both at  
386 30°C and after temperature shift to 42°C (1 hour) and back to 30°C, in both the array and upstream regions (Fig.  
387 7A). However, the former spot on the Y-arc, indicative of replication blockage, is now absent showing successful  
388 release of the protein roadblock. The absence of RecG left a proportion of HJs and forks that were yet to be  
389 processed and/or migrated in order to restart replication in a timely manner. Despite the inability of the cells to  
390 resolve these intermediates within the 10 minute window, they were able to eventually recover their viability  
391 upon release of the block (Fig. 7B), indicating that this was a delay rather than a failure to restart DNA replication.  
392 To ensure the DNA structures visible in the 2-D gels were not an artefact of the presence of DnaBts, the same  
393 assay was performed on a *recG* strain with WT DnaB (Fig. S3). The resulting 2-D gel showed similar signals as for  
394 the *dnaBts* equivalent.

395 The addition of AT to the *dnaBts ruvABC* mutant resulted in barely visible HJ and Y-arc signals upstream of the  
396 array, both at 30°C and after temperature shifting. In the array region, the HJ and Y-arc signal were faint, but  
397 clearly present, though at a lower level than in the equivalent *recG* mutant (Fig. 7A). This may also suggest a  
398 slight delay in replication restart, and longer persistence of HJ intermediates in the absence of RuvABC. Overall,  
399 the majority of HJs were able to be processed or resolved in the absence of RuvABC (compare Fig. 4 to Fig. 7).  
400 Following addition of AT to allow replication to proceed through the array, the number of foci within each cell  
401 was similar to that seen in *dnaBts*; 72% of cells had two or more foci at 30°C but following the temperature shift  
402 to 42°C only 21% showed multiple foci in the presence of AT (Fig. 7C). Cell viability was also completely restored  
403 by 10 minutes treatment with AT (Fig. 7B).

404 Linear DNA was the only DNA structure visualised by 2-D gels in both the array and upstream regions of a *dnaBts*  
405 *recQ* mutant following the release of the roadblock via AT addition at 30°C (Fig. 7A). Replication restart was also  
406 seen to be similar to *dnaBts* in terms of cell viability and the number of foci observed per cell as replication  
407 restarted (Fig. 7B and C). However, following the temperature shift, lingering intermediate signals remained in  
408 both regions (Fig. 7A). Cell viability was seen to be fully restored in the *dnaBts recQ* following addition of AT (Fig.  
409 7B) suggesting replication restart does eventually occur across the population. Furthermore, the double and  
410 triple mutants did not affect replication restart, as their viabilities were shown to be restored to levels not  
411 significantly different from untreated (Fig. S4).

## 412 Discussion

413 It has been proposed that almost all replication forks in *E. coli* will encounter DNA damage on the template  
414 during replication in normal growth conditions (5), and that collision with nucleoprotein complexes provides an  
415 even greater impediment to replication progression than DNA damage (3). This study examined the relative  
416 contributions of RecG, RuvABC and RecQ in the reversal and processing of replication forks that had collapsed  
417 at a nucleoprotein block, *in vivo*. An array of repressor-operator complexes allowed replication to be arrested at  
418 a specific location on the chromosome. Introduction of a temperature sensitive allele of DnaB enabled the  
419 synchronous deactivation (and possible dissociation) of the replisome across the cell population in order to be  
420 able to assess the DNA processing events that followed. Processing of the stalled replication fork DNA can be  
421 seen by the loss of Y-shaped DNA at the block upon replication fork collapse, concurrent with HJ being seen in  
422 the region upstream of the array. The simplest conclusion is that collapse of the replisome leads to RFR, the first  
423 processing event thought to occur at a stalled fork. RecG and RuvABC, two branched-DNA specific motor  
424 proteins, have previously been implicated in the reversal of stalled replication forks (8, 20). In this study, both  
425 *dnaBts recG* and *dnaBts ruvABC* mutants showed a similar deficiency in fork processing upon replisome  
426 dissociation, with ~30% and ~35% respectively of the initial forked DNA at the block site remaining after an hour  
427 at 42°C, compared to ~24% in *dnaBts*. This increase in the quantity of forks remaining at the block lead us to  
428 conclude that both RecG and RuvABC assist in RFR of a blocked fork. However, a greater percentage of forks  
429 were found to remain at the block in the *recQ* mutant (50%) highlighting the key role of RecQ in facilitating RFR.



430 Previously, RecQ has been shown to bind and unwind a diverse range of DNA substrates *in vitro* (36), including  
431 unwinding of dsDNA without a ssDNA gap (52), and displays a 3'-5' movement along one strand. The RecQ  
432 catalysed unwinding is optimal when two or more monomers act on a single DNA substrate, providing an  
433 increased rate of unwinding. This *in vitro* mechanism of action for RecQ is consistent with the *in vivo* evidence  
434 presented here of RecQ's involvement in RFR. The involvement of RecQ in the RecFOR-mediated homologous  
435 recombination pathway suggests that it migrates on one strand to produce or enlarge ssDNA gaps. RecJ may  
436 then also aid the process by degrading the displaced strand from its 5' end and enabling RecFOR-mediated  
437 loading of RecA onto the ssDNA to initiate strand exchange. At a stalled fork, RecQ could load onto the lagging  
438 strand gap and act to enlarge the ssDNA region. RecA may then mediate strand exchange to re-pair the two  
439 template DNA strands, leading to fork reversal (Fig. 8). Alternatively, RecQ may play another, not mutually  
440 exclusive, role by acting at a fork which has been reversed by RecA-mediated strand exchange. Two RecQ  
441 proteins proceeding in opposite directions from the branch point of the fork along the lagging strand template  
442 (unpairing the nascent lagging strand) and the nascent leading strand (unpairing it from the leading strand  
443 template) could directly facilitate RFR by converting both nascent strands into ssDNA allowing their mutual  
444 pairing.

445 The key role for RecQ found in this study reflects evidence on replication fork processing in eukaryotes. The  
446 human RecQ homologs BLM, WRN and RECQ5 have been heavily implicated in regressing replication forks (40,  
447 41, 53-55), and their absence leads to a predisposition to cancer, genetic instability and premature aging. In  
448 yeast the Sgs1 protein is the single RecQ homologue and has been shown to associate with stalled replication  
449 forks following HU-treatment (56). Thus, the proposed role of RecQ in RFR in *E. coli* may be functionally  
450 conserved between bacteria and eukaryotes.

451 RecG has been shown *in vitro* to be able to regress Y-shaped forked DNA into a HJ, but it has a preference for  
452 forks where the leading strand is absent or there is a gap on the leading strand (57). However, it would seem  
453 likely that a replisome blocked by a protein on the DNA template would synthesise DNA on the leading strand  
454 at least as far as on the lagging strand, or further. Blockage of replication at the Tus/*ter* complex resulted in  
455 leading strand synthesis right up to 4 bases from the conserved GC6 of the *ter* site both *in vivo* and *in vitro*,  
456 whereas lagging strand synthesis only approached to 50-100 nucleotides from the bound Tus protein (58, 59). A  
457 similar disposition of strands would be expected for any protein block on the DNA template. Furthermore, the

458 crystal structure of RecG on a model forked DNA structure showed that it binds to the duplex DNA of the  
459 template ahead of the stalled fork in order to catalyse regression (26). Although the reported structure only  
460 contained 10 bp of template DNA ahead of the branch point, domain 3 of RecG is positioned to contact DNA  
461 over a further region of approximately 10-15 bp. If another protein were present blocking the replication fork  
462 then it seems likely that this would sterically hinder access of RecG to the 20-25 bp of DNA it requires for binding,  
463 preventing it from catalysing fork reversal. Together, the structural preference of RecG and the steric hindrance  
464 from a protein roadblock may explain why RecG appeared to play a relatively minor role in RFR following  
465 encounter of the replisome with a protein roadblock. RecG may be more active in RFR on other substrates.

466 RuvAB has been shown to be able to regress a fork *in vitro* to form a HJ, but it does so with low efficiency,  
467 preferring to unwind DNA in the opposite direction from that required to form a HJ (60). RuvAB has instead been  
468 shown to efficiently migrate a pre-formed HJ *in vitro* (61). Because of this, RecG has been suggested to first  
469 regress the stalled fork to form a HJ which RuvAB subsequently branch migrates (29). Additionally, RuvC has  
470 been shown to cleave the HJs formed by RecG regression (19). Consistent with this, a relatively minor role for  
471 RuvABC in direct RFR was observed in this study. The similarity between the phenotypes of *ruvABC*, *recG* and  
472 the combination *recGruvABC* double mutant in these assays, supports the notion that they may play roles in the  
473 same pathway. However, the majority of RFR observed here was dependent upon the action of RecQ. It is likely  
474 that the pathway utilised for processing a stalled fork is dependent upon the exact structure of the DNA at the  
475 branch point, namely the relative disposition of the leading and lagging strands. A heterogeneous population of  
476 DNA structures *in vivo* may account for the fact that a proportion of forks are processed in the absence of RecQ.  
477 In addition, multiple overlapping pathways may exist to catalyse RFR and in the absence of RecQ a less efficient  
478 pathway predominates. The diversity in the possible structures of the DNA at a replication block may account  
479 for differences seen in processing pathways utilised by the cell, particularly after treatment with UV where  
480 previously a RecF-pathway dependent processing event has been found to repair the fork (62).

481 When mutations in *recQ* were combined with *recG* and *ruvABC*, it was found that there was a further decrease  
482 in the efficiency of RFR with ~60% and ~55% of replication forks, respectively, remaining unprocessed after one  
483 hour following inactivation of DnaBts. The *recQrecGruvABC* mutant showed a similar decreased efficiency of RFR  
484 to the double mutants, with ~60% of the replication forks remaining after 1 hour at 42°C. This result again  
485 suggests that RecG and RuvABC may be associated in the same processing pathway. Concurrently with this there

486 was an increased HJ signal upstream of the roadblock in the double mutants, suggesting a delay in dealing with  
487 processing the HJs that result from the reduced level of RFR.

488 RFR is only one possible mechanism to deal with a collapsed replication fork; another proposal is that direct  
489 endonuclease action on an arrested fork can lead to breakage of one arm at the fork, which can then be repaired  
490 by homologous recombination. However, the results presented here show that this did not occur at the majority  
491 of forks. Stalled Y-shaped DNA in a *recQ* mutant was largely stable over an hour suggesting nuclease action must  
492 be slow or only works on a sub-population of fork structures, with the majority normally being processed by  
493 RFR. Upon cleavage, the released DNA arm would most likely be acted upon by exonucleases such as RecBCD  
494 prior to loading of RecA and the initiation of strand exchange. Homologous recombination initiated by RecA  
495 would produce a HJ that RuvC would be required to resolve in order to restore the Y-shaped fork structure.  
496 Efficient restart and recovery of viability in a *ruvABC* mutant argues against this pathway being utilised to any  
497 great extent. Further, in the absence of functional DnaB (and hence the absence of the entire replisome on DNA)  
498 the Y-shaped structure resulting from homologous recombination would not be located at the site of the original  
499 blockage, but the branch of the Y would be located further upstream depending on the extent of exonuclease  
500 processing prior to loading of RecA. This is inconsistent with the long-lived Y-signal in the *recQ* mutants at the  
501 site of the roadblock. Therefore, we conclude that once replication is blocked by a protein complex on DNA it is  
502 mostly processed by RFR, and that this occurs rapidly (44). For the same reasons it is most likely that the HJ  
503 observed in the DNA immediately upstream of the replication roadblock is the direct result of RFR, rather than  
504 being an intermediate in repair of a free double stranded end by homologous recombination. Indeed,  
505 mechanistically it makes sense for the cell to avoid producing a broken DNA molecule if possible, as this can lead  
506 to potentially mutagenic repair processes.

507 The other possible processing event at the collapsed replication fork is the action of exonucleases that digest  
508 the two nascent DNA strands, an activity that has been previously reported when DnaBts is inactivated and is  
509 attributed to RecJ and ExoI (50). There is indeed a Y-arc signal seen in the upstream DNA along with HJ that could  
510 be the result of exonuclease action. However, what is unclear is whether the exonucleases act on the DNA of  
511 the Y-shaped fork, or on the ends of the reversed HJ produced by RFR, as these would both produce the same  
512 structure in the upstream DNA. It should also be noted that the HJs detected are most likely an underestimate  
513 of the HJ levels *in vivo*. Each HJ is free to branch migrate and should be fully homologous throughout its

514 sequence. If branch migration occurs to move the branch point all the way to one end of a DNA arm, then the  
515 HJ can dissolve into two DNA duplexes that would migrate in the linear spot seen. This process would be  
516 essentially irreversible. Cell lysis, washing and DNA digestion occur over the period of days giving ample time for  
517 some HJ dissolution. Similarly, if one arm of the HJ has been partially digested by exonucleases, then branch  
518 migration to the end of this arm would convert the HJ to Y-shaped DNA. Given these caveats about the observed  
519 level of HJ seen, then it seems plausible that RFR is the major pathway utilized in cells and the HJ level observed  
520 underestimates this.

521 The SOS regulatory response is induced by the prolonged presence of RecA filaments on ssDNA, and may be  
522 induced during long periods of fork stalling and processing. An exact time scale for SOS induction from fork stalls  
523 cannot be universal as it will likely vary between cells and the pathway for DNA processing that each chooses.  
524 To detect SOS induction, a reporter strain was created to determine the activation time of SOS response once  
525 replication forks had been stalled in our system. Importantly, no evidence of SOS induction was detected 2-hours  
526 after creation of a replication roadblock (Figure 3). During the experiments described here the typical fork-  
527 blocking induction period is 90 minutes, followed by an additional hour, at most (at 42°C or 30°C), leading one  
528 to conclude that our artificial block does not induce the SOS response in WT cells. The *dnaBts* strain behaved  
529 similar to WT, with the *dnaBts* allele used simply as a means to amplify processing events and the majority of  
530 RFR occurring in the first 15 minutes (Figure 2). Thus, the RFR visualised in a *dnaBts* strain remains a valid  
531 interpretation of the mutants' results and not an artifact of SOS response processing within the timeframe  
532 assessed. The SOS response begins to activate minimally only after 4 hours of fork stalling, exacerbated to the  
533 entirety of the cell population after 24 hours. The release of a replication fork block by addition of AT did not  
534 lead to activation of the SOS response suggesting that replication can recover quickly once TetR-YFP leaves the  
535 DNA. This result also rules out the possibility that the mCherry protein did not have sufficient time for folding  
536 within the 2 hour replication block- no fluorescence was seen in these cells at longer time points either.

537 Although the effect of deletion of *recG* upon RFR was modest, it was clear that in the absence of RecG a much  
538 stronger HJ signal was seen in the region upstream of the replication roadblock. This implicates RecG in the  
539 timely processing of HJs. The simplest and least recombinogenic mechanism to deal with a HJ produced by RFR  
540 is to branch migrate the junction back into a Y-shaped fork, upon which the replisome can be reloaded, and this  
541 may be a role played by RecG. *recG* mutants also showed an accumulation of HJ structures during replication

542 restart (Fig. 7 and Fig. S3) suggesting that HJs persist even after the replication roadblock has been removed in  
543 these cells, although the viability data suggests that the delay to recovery is not fatal and is eventually overcome.  
544 The deletion of *ruvABC* was also seen to increase the level and persistence of HJs in the upstream DNA region,  
545 consistent with the known role of the complex in branch migration and resolution of HJs.

546 It is noteworthy that HJs are seen to be present upstream of the replication roadblock in both *recGruvABC* and  
547 *recQrecGruvABC* backgrounds, and that the levels of these intermediates decline over time, along with a  
548 reduction in Y-shaped DNA at the block. There is clearly another process able to either migrate the HJs out of  
549 the region being probed or to resolve the HJ. As a result of this finding, we concluded that neither RecG nor  
550 RuvABC are absolutely required for HJs to be processed. RuvA, the only other known endogenous HJ resolving  
551 enzyme in *E. coli*, is absent from the strains used in this study. Spontaneous branch migration of the HJ out of  
552 the region being examined could explain these results, but subsequent recovery of replication would then also  
553 depend upon the branch migration occurring to regenerate the Y-shaped structure to allow replisome re-  
554 loading. An alternative pathway that has been proposed is the action of RecBCD (Fig. 8). One arm of the HJ  
555 formed by RFR has a DNA end. Single strand specific exonucleases can digest an overhang on this DNA end to  
556 produce a blunt ended duplex; ExoI and SbcCD can digest the 3' overhang that would result from the leading  
557 strand having gone further than the lagging strand dsDNA end (63, 64). Conversely, RecJ can remove a 5'  
558 overhang if the lagging strand was ahead of the leading strand upon RFR. Once the DNA end is blunt, RecBCD  
559 can load and processively digest both strands, gradually removing one entire arm of the HJ. The effect of this  
560 would be to convert HJ into a Y-shaped structure upon which replication proteins could be loaded allowing  
561 restart. It is notable that Y-shaped DNA is seen upstream of the replication roadblock when HJ is present,  
562 supporting this model of RecBCD action. RecBCD action can also lead to RecA loading after an encounter with a  
563 Chi site, eventually producing a second HJ by strand invasion. This double HJ can then be resolved either by RuvC  
564 or by branch migration and possibly action of a topoisomerase (such as Topo III) (65). It is also worth noting that  
565 RecQ could also be involved in digesting the free arm of the HJ produced by RFR; RecQ could act on a 3' ssDNA  
566 overhang and subsequent translocation would eventually unwind duplex DNA allowing RecJ to digest the 5' end  
567 strand (51). If the leading strand had proceeded further than the lagging strand then upon RFR the HJ would  
568 indeed have a 3' ssDNA overhang.

569 The proposed model (Fig. 8) has some testable predictions. The establishment of the system described here to

570 study replication fork processing *in vivo* can be built upon in future work to examine the roles of other proteins  
571 such as RecA, RecFOR, SbcCD, RecBCD, XonA and RecJ. This could lead to a comprehensive understanding of the  
572 complex and overlapping roles played by the many homologous recombination proteins in this key DNA repair  
573 process.

574

575

576

577

578

579

580

581

582

583

584

585

586

587

588

589

590

591

## 592 **Materials and Methods**

### 593 **Strains and plasmids**

594 Bacterial strains were derivatives of *E. coli* K12 AB1157 (66) which carry 240 copies of *tetO* in an array within the  
595 *lacZ* gene (67) and the pKM1 plasmid encoding the TetR-YFP repressor under the control of the *Para* promoter  
596 (44). Lambda Red recombination was conducted initially to replace *recQ*, *recG*, *ruvABC*, *recA* and *uvrD* with a  
597 spectinomycin resistance cassette (68). The resistance cassette was subsequently removed by Flp recombinase,  
598 leaving only an FRT site flanked by the start and stop codons (68). The temperature-sensitive *dnaBts* allele (69)  
599 and all gene knockout strains were created by P1 transduction and confirmed by PCR (Table S1 for list of strains).  
600 The *sulAp*-mCherry construct, created by fusing the *sulA* promoter to mCherry, was inserted into the  
601 chromosome approximately halfway between *ori* and *ter* on the left replicore by Lambda Red recombination  
602 in a non-coding region while the constitutive *sulA* gene remained.

### 603 **Bacterial growth**

604 Cultures grown overnight at 30°C in L-broth were diluted to  $OD_{600nm} = 0.01$  in a dilute complex medium (0.1%  
605 tryptone, 0.05% yeast extract, 0.1% NaCl, 0.17 M  $KH_2PO_4$ , 0.72 M  $K_2HPO_4$ ). Cells were supplemented with  
606 ampicillin (100 µg/ml) and/or kanamycin (50 µg/ml) as required. Production of the fluorescent repressor TetR-  
607 YFP was induced by addition of 0.1% (w/v) arabinose once cells had reached at least  $OD_{600nm} = 0.05$ . Cells were  
608 then incubated for 90 minutes and examined under a fluorescence microscope as described previously (70) to  
609 confirm the extent of replication blockage across the cell population. A minimum of 200 cells were assessed and  
610 foci counted. Cells were shifted to 42°C for an hour to induce replisome collapse in the temperature sensitive  
611 *dnaBts* strain. Subsequently, the cells were shifted back to 30°C for 10 minutes. Tight repressor binding was  
612 relieved by the addition of the gratuitous inducer anhydrotetracycline (AT; 10 µg/ml). Cell viability was  
613 determined by performing a 10-fold serial dilution and 5 µl of each dilution was spotted on agar containing the  
614 required antibiotic (and AT if needed). Selected dilutions were spread onto agar to determine CFU/ml. All plates  
615 were grown at 30°C overnight.

616 For *sulAp*-mCherry strains, an overnight culture was diluted in complex medium and grown to at least  $OD_{600nm} =$   
617 0.05 at 30°C before 0.1% arabinose was added. Samples were taken after 2, 4, 6 and 24 hours. After the two  
618 hours incubation, a subculture was treated with AT (10 µg/ml) and samples were taken after 2, 4 and 22 hours

619 of growth at 30°C. Samples were re-suspended in PBS and Relative Fluorescence Units (RFU) of mCherry were  
620 detected with the FLUOstart micro-plate reader (BMG Labtech). The final RFU value was determined by  
621 normalising to cell density ( $OD_{600nm}$ ) then subtracting the normalised RFU of the untreated control from the  
622 same time point.

### 623 **2-D DNA agarose gel electrophoresis and Southern hybridisation**

624 Samples of cells were taken at the indicated time points and the DNA prepared as previously outlined (44, 70).  
625 DNA was digested with either EcoRI (array region) or HincII (region upstream of the array). 2-D gel conditions  
626 and Southern hybridisation were as described by (70). Statistical analysis was determined using the Student's t  
627 test.

628



629 **References**

- 630 1. Boubakri H, de Septenville AL, Viguera E, Michel B. The helicases DinG, Rep and UvrD  
631 cooperate to promote replication across transcription units in vivo. *The EMBO Journal*.  
632 2010;29(1):145-57.
- 633 2. Guy CP, Atkinson J, Gupta MK, Mahdi AA, Gwynn EJ, Rudolph CJ, et al. Rep provides a  
634 second motor at the replisome to promote duplication of protein-bound DNA. *Mol Cell*.  
635 2009;36(4):654-66.
- 636 3. Gupta MK, Guy CP, Yeeles JT, Atkinson J, Bell H, Lloyd RG, et al. Protein-DNA complexes  
637 are the primary sources of replication fork pausing in *Escherichia coli*. *Proc Natl Acad Sci USA*.  
638 2013;110(18):7252-7.
- 639 4. Marians KJ. PriA-directed replication fork restart in *Escherichia coli*. *Trends Biochem*  
640 *Sci*. 2000;25(4):185-9.
- 641 5. Cox MM, Goodman MF, Kreuzer KN, Sherratt DJ, Sandler SJ, Marians KJ. The  
642 importance of repairing stalled replication forks. *Nature*. 2000;404(6773):37-41.
- 643 6. Cox MM. Recombinational DNA repair of damaged replication forks in *Escherichia coli*:  
644 questions. *Annu Rev Genet*. 2001;35:53-82.
- 645 7. Mangiameli SM, Merrikh CN, Wiggins PA, Merrikh H. Transcription leads to pervasive  
646 replisome instability in bacteria. *eLife*. 2017;6:e19848.
- 647 8. Seigneur M, Bidnenko V, Ehrlich SD, Michel B. RuvAB acts at arrested replication forks.  
648 *Cell*. 1998;95(3):419-30.
- 649 9. Dillingham MS, Kowalczykowski SC. RecBCD enzyme and the repair of double-stranded  
650 DNA breaks. *Microbiol Mol Biol Rev*. 2008;72(4):642-71, Table of Contents.
- 651 10. Atkinson J, McGlynn P. Replication fork reversal and the maintenance of genome  
652 stability. *Nucleic Acids Res*. 2009;37(11):3475-92.

- 653 11. Phizicky EM, Roberts JW. Induction of SOS functions: regulation of proteolytic activity  
654 of *E. coli* RecA protein by interaction with DNA and nucleoside triphosphate. *Cell*.  
655 1981;25(1):259-67.
- 656 12. Friedberg EC, Walker GC, Siede W. DNA Repair and Mutagenesis: ASM Press; 1995.
- 657 13. Cox MM. Regulation of bacterial RecA protein function. *Crit Rev Biochem Mol Biol*.  
658 2007;42(1):41-63.
- 659 14. Seigneur M, Ehrlich SD, Michel B. RuvABC-dependent double-strand breaks in *dnaBts*  
660 mutants require *recA*. *Mol Microbiol*. 2000;38(3):565-74.
- 661 15. Gupta S, Yeeles JT, Marians KJ. Regression of replication forks stalled by leading-strand  
662 template damage: II. Regression by RecA is inhibited by SSB. *J Biol Chem*. 2014;289(41):28388-  
663 98.
- 664 16. Robu ME, Inman RB, Cox MM. RecA protein promotes the regression of stalled  
665 replication forks *in vitro*. *Proc Natl Acad Sci USA*. 2001;98(15):8211-8.
- 666 17. Robu ME, Inman RB, Cox MM. Situational repair of replication forks: roles of RecG and  
667 RecA proteins. *J Biol Chem*. 2004;279(12):10973-81.
- 668 18. Postow L, Ullsperger C, Keller RW, Bustamante C, Vologodskii AV, Cozzarelli NR.  
669 Positive torsional strain causes the formation of a four-way junction at replication forks. *J Biol*  
670 *Chem*. 2001;276(4):2790-6.
- 671 19. Gupta S, Yeeles JT, Marians KJ. Regression of replication forks stalled by leading-strand  
672 template damage: I. Both RecG and RuvAB catalyze regression, but RuvC cleaves the holliday  
673 junctions formed by RecG preferentially. *J Biol Chem*. 2014;289(41):28376-87.
- 674 20. McGlynn P, Lloyd RG. Modulation of RNA polymerase by (p)ppGpp reveals a RecG-  
675 dependent mechanism for replication fork progression. *Cell*. 2000;101(1):35-45.
- 676 21. Abd Wahab S, Choi M, Bianco PR. Characterization of the ATPase activity of RecG and  
677 RuvAB proteins on model fork structures reveals insight into stalled DNA replication fork  
678 repair. *J Biol Chem*. 2013;288(37):26397-409.

- 679 22. Iwasaki H, Takahagi M, Nakata A, Shinagawa H. *Escherichia coli* RuvA and RuvB  
680 proteins specifically interact with Holliday junctions and promote branch migration. *Genes &*  
681 *Dev.* 1992;6(11):2214-20.
- 682 23. Shah R, Cosstick R, West SC. The RuvC protein dimer resolves Holliday junctions by a  
683 dual incision mechanism that involves base-specific contacts. *EMBO J.* 1997;16(6):1464-72.
- 684 24. Lloyd RG, Rudolph CJ. 25 years on and no end in sight: a perspective on the role of  
685 RecG protein. *Curr Genet.* 2016:1-14.
- 686 25. Mahdi AA, McGlynn P, Levett SD, Lloyd RG. DNA binding and helicase domains of the  
687 *Escherichia coli* recombination protein RecG. *Nucleic Acids Res.* 1997;25(19):3875-80.
- 688 26. Singleton MR, Scaife S, Wigley DB. Structural analysis of DNA replication fork reversal  
689 by RecG. *Cell.* 2001;107(1):79-89.
- 690 27. Baharoglu Z, Petranovic M, Flores MJ, Michel B. RuvAB is essential for replication forks  
691 reversal in certain replication mutants. *EMBO J.* 2006;25(3):596-604.
- 692 28. Manosas M, Perumal SK, Bianco PR, Ritort F, Benkovic SJ, Croquette V. RecG and UvsW  
693 catalyse robust DNA rewinding critical for stalled DNA replication fork rescue. *Nat Commun.*  
694 2013;4:2368.
- 695 29. Buss JA, Kimura Y, Bianco PR. RecG interacts directly with SSB: implications for stalled  
696 replication fork regression. *Nucleic Acids Res.* 2008;36(22):7029-42.
- 697 30. Zhang XD, Dou SX, Xie P, Hu JS, Wang PY, Xi XG. *Escherichia coli* RecQ is a rapid,  
698 efficient, and monomeric helicase. *J Biol Chem.* 2006;281(18):12655-63.
- 699 31. Nakayama H, Nakayama K, Nakayama R, Irino N, Nakayama Y, Hanawalt PC. Isolation  
700 and genetic characterization of a thymineless death-resistant mutant of *Escherichia coli* K12:  
701 identification of a new mutation (recQ1) that blocks the RecF recombination pathway. *Mol*  
702 *Gen Genet.* 1984;195(3):474-80.
- 703 32. Nakayama K, Irino N, Nakayama H. The recQ gene of *Escherichia coli* K12: molecular  
704 cloning and isolation of insertion mutants. *Mol Gen Genet.* 1985;200(2):266-71.

- 705 33. Harmon FG, Kowalczykowski SC. Biochemical characterization of the DNA helicase  
706 activity of the *Escherichia coli* RecQ helicase. J Biol Chem. 2001;276(1):232-43.
- 707 34. Umezu K, Nakayama H. RecQ DNA helicase of *Escherichia coli*. Characterization of the  
708 helix-unwinding activity with emphasis on the effect of single-stranded DNA-binding protein.  
709 J Mol Biol. 1993;230(4):1145-50.
- 710 35. Umezu K, Nakayama K, Nakayama H. *Escherichia coli* RecQ protein is a DNA helicase.  
711 Proc Natl Acad Sci U S A. 1990;87(14):5363-7.
- 712 36. Harmon FG, Kowalczykowski SC. RecQ helicase, in concert with RecA and SSB proteins,  
713 initiates and disrupts DNA recombination. Genes Dev. 1998;12(8):1134-44.
- 714 37. Suski C, Marians KJ. Resolution of Converging Replication Forks by RecQ and  
715 Topoisomerase III. Mol Cell. 2008;30(6):779-89.
- 716 38. Courcelle J, Hanawalt PC. RecQ and RecJ process blocked replication forks prior to the  
717 resumption of replication in UV-irradiated *Escherichia coli*. Mol Gen Genet. 1999;262(3):543-  
718 51.
- 719 39. Morimatsu K, Kowalczykowski SC. RecQ helicase and RecJ nuclease provide  
720 complementary functions to resect DNA for homologous recombination. Proc Natl Acad Sci  
721 USA. 2014;111(48):E5133-42.
- 722 40. Machwe A, Xiao L, Groden J, Orren DK. The Werner and Bloom syndrome proteins  
723 catalyze regression of a model replication fork. Biochem. 2006;45(47):13939-46.
- 724 41. Ralf C, Hickson ID, Wu L. The Bloom's syndrome helicase can promote the regression  
725 of a model replication fork. J Biol Chem. 2006;281(32):22839-46.
- 726 42. Machwe A, Lozada EM, Xiao L, Orren DK. Competition between the DNA unwinding  
727 and strand pairing activities of the Werner and Bloom syndrome proteins. BMC Mol Biol.  
728 2006;7:1.

- 729 43. Berti M, Ray Chaudhuri A, Thangavel S, Gomathinayagam S, Kenig S, Vujanovic M, et  
730 al. Human RECQ1 promotes restart of replication forks reversed by DNA topoisomerase I  
731 inhibition. *Nat Struct Mol Biol.* 2013;20(3):347-54.
- 732 44. Mettrick KA, Grainge I. Stability of blocked replication forks *in vivo*. *Nucleic Acids Res.*  
733 2016;44(2):657-68.
- 734 45. Possoz C, Filipe SR, Grainge I, Sherratt DJ. Tracking of controlled *Escherichia coli*  
735 replication fork stalling and restart at repressor-bound DNA *in vivo*. *EMBO J.*  
736 2006;25(11):2596-604.
- 737 46. Nielsen HJ, Li Y, Youngren B, Hansen FG, Austin S. Progressive segregation of the  
738 *Escherichia coli* chromosome. *Mol Microbiol.* 2006;61(2):383-93.
- 739 47. Joshi MC, Bourniquel A, Fisher J, Ho BT, Magnan D, Kleckner N, et al. *Escherichia coli*  
740 sister chromosome separation includes an abrupt global transition with concomitant release  
741 of late-splitting intersister snaps. *Proc Natl Acad Sci USA.* 2011;108(7):2765-70.
- 742 48. Courcelle J, Khodursky A, Peter B, Brown PO, Hanawalt PC. Comparative gene  
743 expression profiles following UV exposure in wild-type and SOS-deficient *Escherichia coli*.  
744 *Genetics.* 2001;158(1):41-64.
- 745 49. Huisman O, D'Ari R. An inducible DNA replication-cell division coupling mechanism in  
746 *E. coli*. *Nature.* 1981;290(5809):797-9.
- 747 50. Belle JJ, Casey A, Courcelle CT, Courcelle J. Inactivation of the DnaB helicase leads to  
748 the collapse and degradation of the replication fork: a comparison to UV-induced arrest. *J*  
749 *Bacteriol.* 2007;189(15):5452-62.
- 750 51. Morimatsu K, Kowalczykowski SC. RecQ helicase and RecJ nuclease provide  
751 complementary functions to resect DNA for homologous recombination. *Proc Natl Acad Sci U*  
752 *S A.* 2014;111(48):E5133-42.

- 753 52. Rad B, Forget AL, Baskin RJ, Kowalczykowski SC. Single-molecule visualization of RecQ  
754 helicase reveals DNA melting, nucleation, and assembly are required for processive DNA  
755 unwinding. *Proc Natl Acad Sci USA*. 2015;112(50):E6852-61.
- 756 53. Mohaghegh P, Karow JK, Brosh RM, Jr., Bohr VA, Hickson ID. The Bloom's and Werner's  
757 syndrome proteins are DNA structure-specific helicases. *Nucleic Acids Res*. 2001;29(13):2843-  
758 9.
- 759 54. Kanagaraj R, Saydam N, Garcia PL, Zheng L, Janscak P. Human RECQ5beta helicase  
760 promotes strand exchange on synthetic DNA structures resembling a stalled replication fork.  
761 *Nucleic Acids Res*. 2006;34(18):5217-31.
- 762 55. Machwe A, Xiao L, Lloyd RG, Bolt E, Orren DK. Replication fork regression in vitro by  
763 the Werner syndrome protein (WRN): holliday junction formation, the effect of leading arm  
764 structure and a potential role for WRN exonuclease activity. *Nucleic Acids Res*.  
765 2007;35(17):5729-47.
- 766 56. Cobb JA, Bjergbaek L, Shimada K, Frei C, Gasser SM. DNA polymerase stabilization at  
767 stalled replication forks requires Mec1 and the RecQ helicase Sgs1. *EMBO J*.  
768 2003;22(16):4325-36.
- 769 57. McGlynn P, Lloyd RG. Rescue of stalled replication forks by RecG: simultaneous  
770 translocation on the leading and lagging strand templates supports an active DNA unwinding  
771 model of fork reversal and Holliday junction formation. *Proc Natl Acad Sci USA*.  
772 2001;98(15):8227-34.
- 773 58. Hill TM, Marians KJ. *Escherichia coli* Tus protein acts to arrest the progression of DNA  
774 replication forks *in vitro*. *Proc Natl Acad Sci USA*. 1990;87(7):2481-5.
- 775 59. Mohanty BK, Sahoo T, Bastia D. Mechanistic studies on the impact of transcription on  
776 sequence-specific termination of DNA replication and vice versa. *J Biol Chem*.  
777 1998;273(5):3051-9.
- 778 60. McGlynn P, Lloyd RG. Action of RuvAB at replication fork structures. *J Biol Chem*.  
779 2001;276(45):41938-44.

- 780 61. Parsons CA, Stasiak A, West SC. The *E. coli* RuvAB proteins branch migrate Holliday  
781 junctions through heterologous DNA sequences in a reaction facilitated by SSB. EMBO J.  
782 1995;14(22):5736-44.
- 783 62. Jeiranian HA, Schalow BJ, Courcelle CT, Courcelle J. Fate of the replisome following  
784 arrest by UV-induced DNA damage in *Escherichia coli*. Proc Natl Acad Sci USA.  
785 2013;110(28):11421-6.
- 786 63. Long JE, Massoni SC, Sandler SJ. RecA4142 causes SOS constitutive expression by  
787 loading onto reversed replication forks in *Escherichia coli* K-12. J Bacteriol.  
788 2010;192(10):2575-82.
- 789 64. Connelly JC, de Leau ES, Leach DR. DNA cleavage and degradation by the SbcCD  
790 protein complex from *Escherichia coli*. Nucleic Acids Res. 1999;27(4):1039-46.
- 791 65. Lopez CR, Yang S, Deibler RW, Ray SA, Pennington JM, Digate RJ, et al. A role for  
792 topoisomerase III in a recombination pathway alternative to RuvABC. Mol Microbiol.  
793 2005;58(1):80-101.
- 794 66. Bachmann BJ. Pedigrees of some mutant strains of *Escherichia coli* K-12. Bacteriol Rev.  
795 1972;36(4):525-57.
- 796 67. Wang X, Liu X, Possoz C, Sherratt DJ. The two *Escherichia coli* chromosome arms locate  
797 to separate cell halves. Genes Dev. 2006;20(13):1727-31.
- 798 68. Datsenko KA, Wanner BL. One-step inactivation of chromosomal genes in *Escherichia*  
799 *coli* K-12 using PCR products. Proc Natl Acad Sci U S A. 2000;97(12):6640-5.
- 800 69. Carl PL. *Escherichia coli* mutants with temperature-sensitive synthesis of DNA. Mol  
801 Gen Genet. 1970;109(2):107-22.
- 802 70. Mettrick KA, Lawrence N, Mason C, Weaver GM, Corocher TA, Grainge I. Inducing a  
803 Site Specific Replication Blockage in *E. coli* Using a Fluorescent Repressor Operator System. J  
804 Vis Exp. 2016;114(114):e54434.

805

806 **Fig1: TetR binding to a *tetO* array creates a controlled replication block that is also reversible.** Wild type and a  
807 strain carrying *dnaBts* were grown at 30°C with 0.1% arabinose (ara) for 2 hours and a subset of these cells were  
808 treated with anhydrotetracycline (AT) for 10 minutes. The arabinose treated cells were shifted to 42°C for an  
809 hour (the non-permissive temperature for DnaBts) then returned to 30°C for 10 minutes (TS). A subpopulation  
810 of these cells were treated with AT. Percentage of (A) Wild type or (C) DnaBts cells containing one focus or  
811 multiple foci after specified treatments, formed by the overproduction of TetR-YFP. Viability of (B) Wild Type or  
812 (D) DnaBts following indicated treatments. A 10-fold serial dilution of the cells was conducted and spotted or  
813 spread onto agar plates supplemented with Amp (for arabinose treated cells), or Amp and AT (for AT treated  
814 cells). DnaBts cells were grown on agar plates that also contained Kan. Spot plates: colony growth at indicated  
815 dilutions. Graphs: cell viability shown as colony forming units per mL +/- SEM. Number of biological replicates:  
816 4.

817 **Fig 2: Replication fork collapse visualised by 2-D agarose gel electrophoresis.** (A) DNA structures from indicated  
818 conditions for array region in WT and DnaBts strains, visualised by Southern hybridisation. Schematic represents  
819 array fragment created by digestion with EcoRI (arrows indicate restriction sites). (B) Quantification of the Y-  
820 structured DNA in the array region at 30°C (2 hours growth with arabinose) and 42°C (an additional 1 hour grown  
821 with ara). \*\*\* = significantly different ( $P < 0.001$ ) from its 30°C counterpart (C) DNA structures from indicated  
822 conditions for region upstream of array in WT and DnaBts strains, visualised by Southern hybridisation.  
823 Schematic indicates upstream fragment created by digestion with HincII (arrows indicate restriction sites). (D)  
824 Representative image illustrating the various DNA structures detected by the probes. When replication is  
825 blocked, forks remain in the array fragment and accumulate at a similar position on the Y-arc. A line signal  
826 protruding from the linear DNA and/or a cone shape extending from the very top of the Y-arc represent Holliday  
827 junctions (HJ). See also Fig. S1. n = 2-3

828 **Fig 3: SOS induction begins after 4 hours of a persistent replication block and increases thereafter.** The strain  
829 carrying *sulAp*-mCherry was grown with 0.05 % arabinose at 30°C and samples were taken after 2, 4, 6 and 24  
830 hours. After the 2 hours, a subset of cells were incubated with AT (10 µg/mL) and samples taken at 2, 4 and 22  
831 hours. SOS induction was observed via A) mCherry fluorescence emission at indicated time points in Relative  
832 Fluorescence Units (RFUs) in blocked (+ara) and released (+ara +AT) cells. Average and standard deviation is  
833 shown from 3 biological replicates. B) microscope images at each time-point in replication blocked cells showing



834 an overlay of phase contrast images and mCherry fluorescence. Red cells indicate *sulAp*-mCherry expression  
835 (SOS induction) Scale bar = 4 microns. See also Fig. S2.

836 **Fig 4: RFR frequency is reduced in *dnaBts recG*, *dnaBts ruvABC* and *dnaBts recQ* mutants.** 2-D gel analysis of  
837 replication block (+ ara) after 0, 15 and 60 minutes at 42°C (the non-permissive temperature for DnaBts),  
838 following an initial growth with arabinose at 30°C for 2 hours. (A) DNA structures within the array region. (B)  
839 Percentage of Y-structured DNA within the 5.8 kb array region. # Denotes significant difference between Y-DNA  
840 amount in *dnaBts* and the mutant at 0 min ( $P < 0.05$ ). At 15 and 60 min, the percentage of Y-DNA remaining in  
841 each mutant was determined and deemed significantly different to that remaining in *dnaBts* (\*  $P < 0.05$ , \*\*  $P <$   
842 0.01, \*\*\*  $P < 0.001$ ) (C) Replication intermediates detected in the region upstream of the array. n = 3

843 **Fig 5: RFR in *dnaBts recGreco*, *dnaBts recQruvABC* and *dnaBts recGruvABC* strains over time.** 2-D gel analysis  
844 of replication block (+ ara) after 0, 15 and 60 minutes at 42°C (the non-permissive temperature for DnaBts),  
845 following an initial growth with arabinose at 30°C for 2 hours. (A) DNA structures within the array region. (B)  
846 Percentage of Y-structured DNA within the 5.8 kb array region. # Denotes significant difference between Y-DNA  
847 amount in *dnaBts* and the mutant at 0 min (#  $P < 0.05$ , ###  $P < 0.01$ ). At 15 and 60 min, the percentage of Y-DNA  
848 remaining in each mutant was determined and deemed significantly different to that remaining in *dnaBts* (\*\*  $P$   
849  $< 0.01$ , \*\*\*  $P < 0.001$ ) (C) Replication intermediates detected in the region upstream of the array. n = 2-3

850 **Fig 6: RFR in a *dnaBts recGruvABCrecQ* mutant.** 2-D gels of the array and upstream regions following 0, 15 and  
851 60 minutes of replication blockage at 42°C (after an initial growth with ara at 30°C for 2 hours) alongside a graph  
852 of the percentage of DNA in the forked structure at each time point. At 15 and 60 min, the percentage of Y-DNA  
853 remaining in each mutant was determined and deemed significantly different to that remaining in *dnaBts* (\*\*  $P$   
854  $< 0.01$ ). n = 2

855 **Fig 7: Replication restart is severely impaired in a *dnaBts recG* mutant and slightly impaired in *dnaBts*  
856 *ruvABC* and *dnaBts recQ* mutants.** Subsequent to an initial growth at 30°C with ara, a subset of cells were  
857 treated with AT for 10 minutes to release the block (+ara +AT 30°C). The remaining cells underwent a  
858 temperature shift from the 30°C to 42°C then returned to 30°C (TS) and exposed to AT for 10 minutes (+ara  
859 +AT TS). Replication intermediate structures visualised by 2-D gel analysis in the array and upstream regions 10  
860 minute after addition of AT (A), cell viability (B) and foci percentages (C) under indicated conditions are shown.  
861 See also Fig. S3 and Fig. S4.

862 **Fig 8: Model for replication fork reversal at a protein roadblock.** Template DNA is shown as black lines and  
863 newly replicated strands are in blue. A proteinaceous roadblock to replication is shown as a grey oval. The most  
864 likely disposition of the leading and lagging strands is shown, with the leading strand coming close to the site of  
865 the block. Upon this substrate RecQ can act, possibly in concert with RecJ, to lengthen the ssDNA gap on the  
866 lagging strand template. RecFOR could then load RecA on the ssDNA, leading to strand exchange which pairs the  
867 two template strands, displacing the nascent leading strand. The initially regressed fork can then be acted on by  
868 a number of pathways such as the known branch migration proteins RecG and RuvAB which could move the HJ  
869 upstream. RecG may also reverse this process to re-create the Y-shaped DNA to allow replisome reloading.  
870 Nuclease action by ExoI/SbcCD, RecQ/J and/or RecBCD could also remove the two nascent DNA strands to  
871 eventually re-generate a Y-shaped fork upstream from the site of the roadblock.

872

873

874

875 **Supporting Information**

876 **Fig. S1. Replication fork collapse and reversal in a *dnaBts* mutant upon shift to a non-permissive**  
877 **temperature.** Cells were grown at 30°C in the presence of 0.1% arabinose for 2 hours to block  
878 replication at the array and then shifted to 42°C to inactivate the replisome. (A) DNA structures within  
879 the array region were visualised by 2-D gels from samples taken at 15-minute intervals following the  
880 shift to 42°C. (B) Percentage of Y-structured DNA within the array region at the specified time points.  
881 n = 3 (C) 2-D gel analysis of replication intermediates detected in the region immediately upstream of  
882 the array.

883 **Fig S2. Replication fork blocks persist over 24 hours in WT cells, SOS is not induced in a *recA***  
884 **mutant but is induced after 4 hours in an *uvrD* mutant.** A) Representative images of WT cells  
885 following arabinose induction over time. Green foci indicate blocked replication and red cells  
886 indicate SOS induction. Scale bar = 1 micron B) mCherry fluorescence observed in *uvrD*- over time in  
887 blocked cells C) mCherry fluorescence emission at indicated time points in Relative Fluorescence  
888 Units (RFUs) in blocked and released cells for both *recA* and *uvrD* mutants. Scale bar = 4 micron.  
889 Biological replicates = 3.

890 **Fig.S3. *recG* mutant impairs replication restart.** Mutant strains underwent treatment as described for  
891 strains shown in Figure 6 but with cells containing the wild type DnaB helicase (i.e. not *dnaBts*).  
892 Replication intermediate structures visualised by 2-D gel analysis in the array and upstream regions  
893 (A), cell viability (B) and foci percentages (C) under indicated conditions. Note the  $\Delta recG$  strain has  
894 higher levels of HJ remaining 10 minutes after the addition of AT than other strains. n = 2-3

895

896

897

898

899 **Fig. S4. Cell viability is restored in *dnaBts* mutant combinations following replication restart.**

900 Viability was obtained under the indicated conditions as in Figure 6. –ara, cells with no replication  
901 blockage. +ara +AT 30°C, cells with replication blocked for 2 hours and then then released. +ara +AT  
902 TS, cells blocked for 2 hours, shifted to 42°C for 1 hour and then returned to 30°C and AT added. n =  
903 2-3

904 **Table S1. *E. coli* strains used in this study**

905

**A**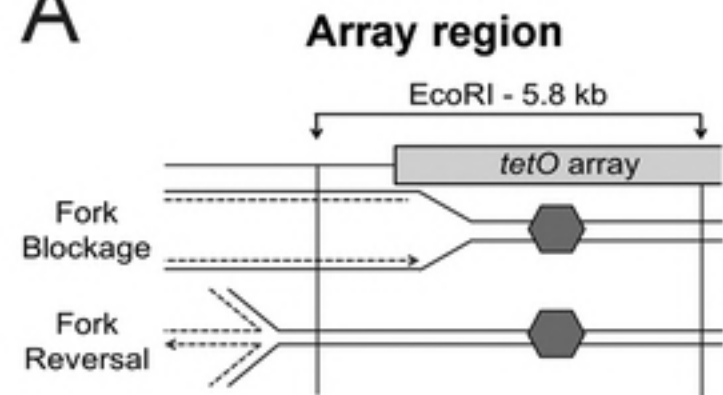

Wild Type

*dnaBts*

ara:

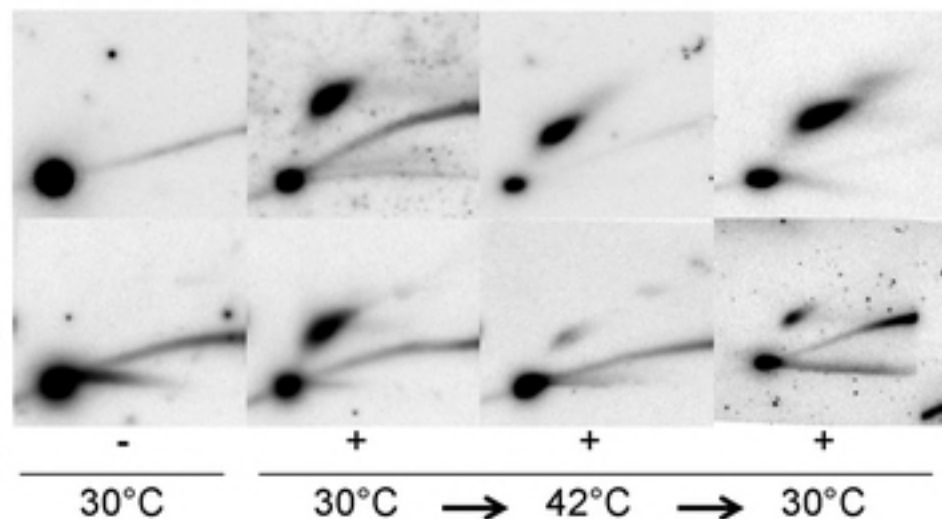**C**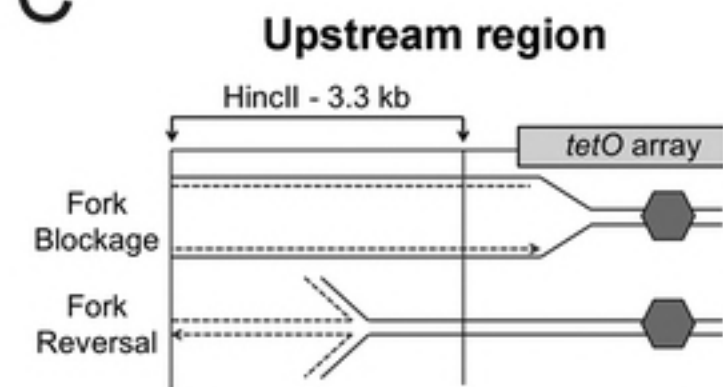

Wild Type

*dnaBts*

ara:

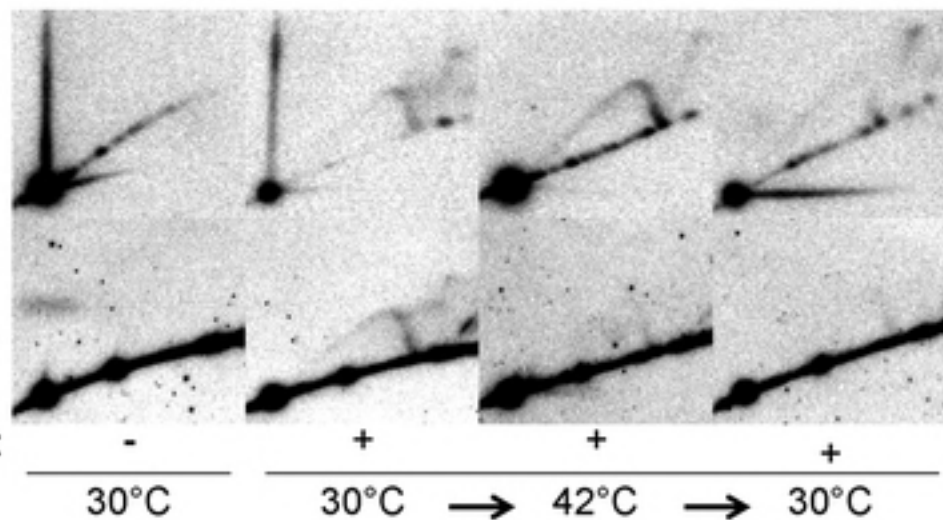**B**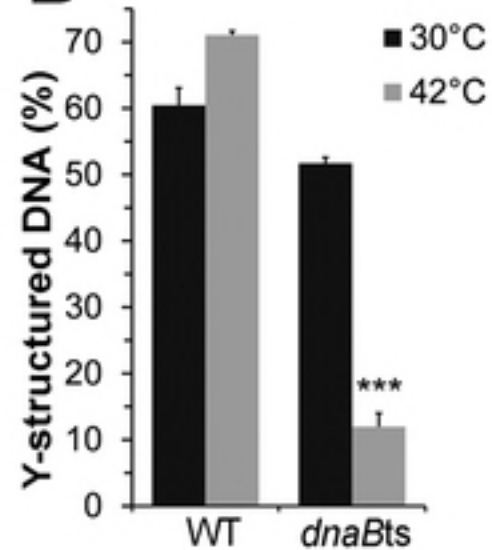**D**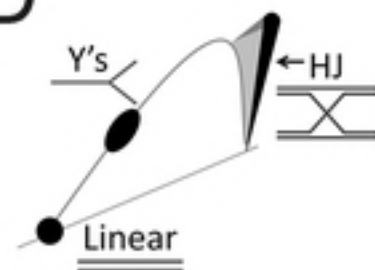

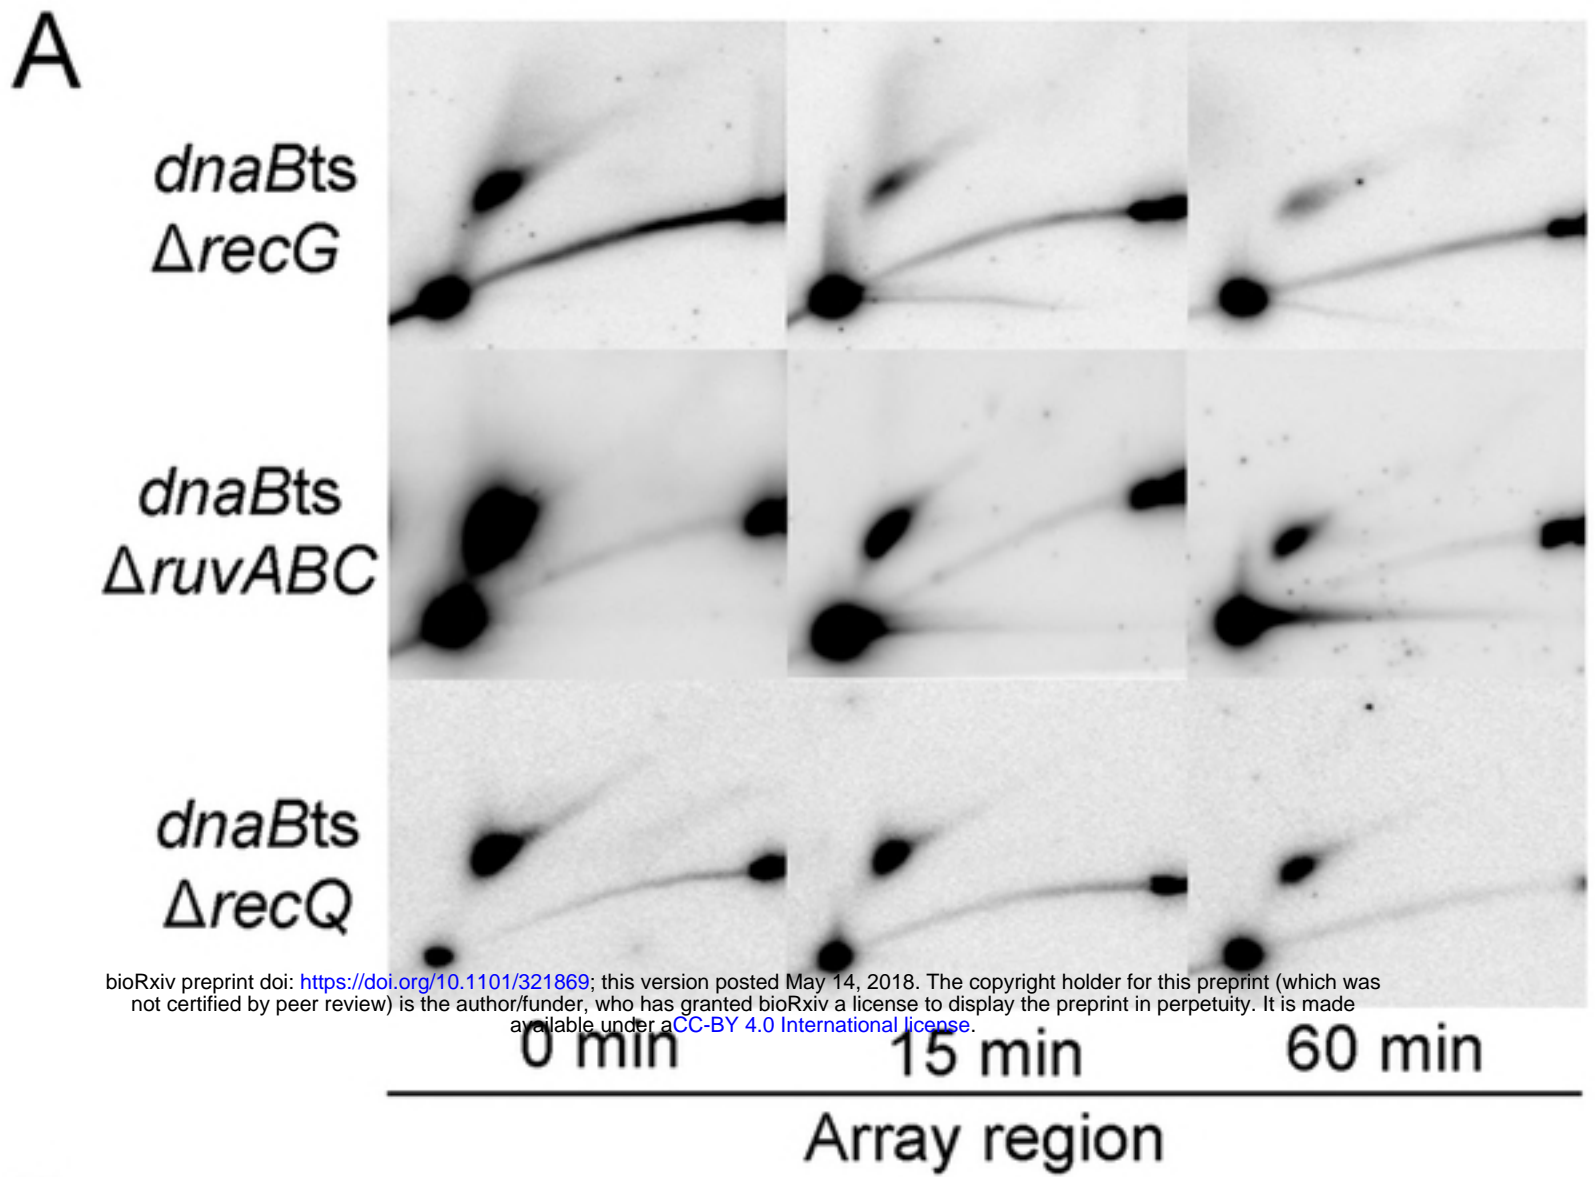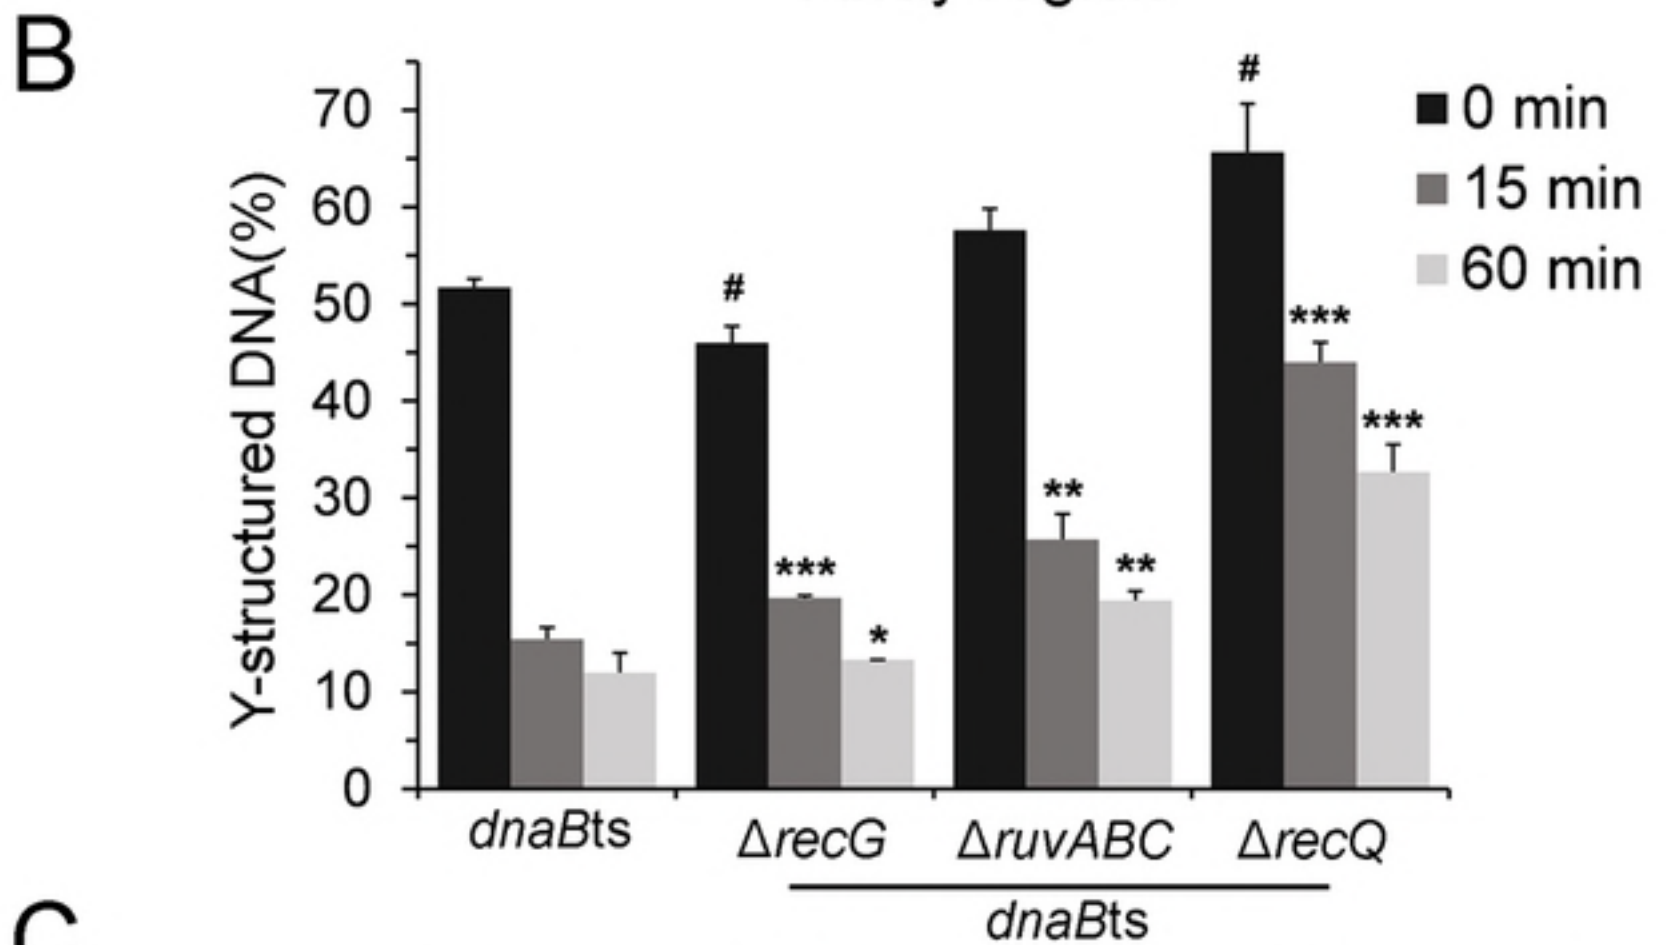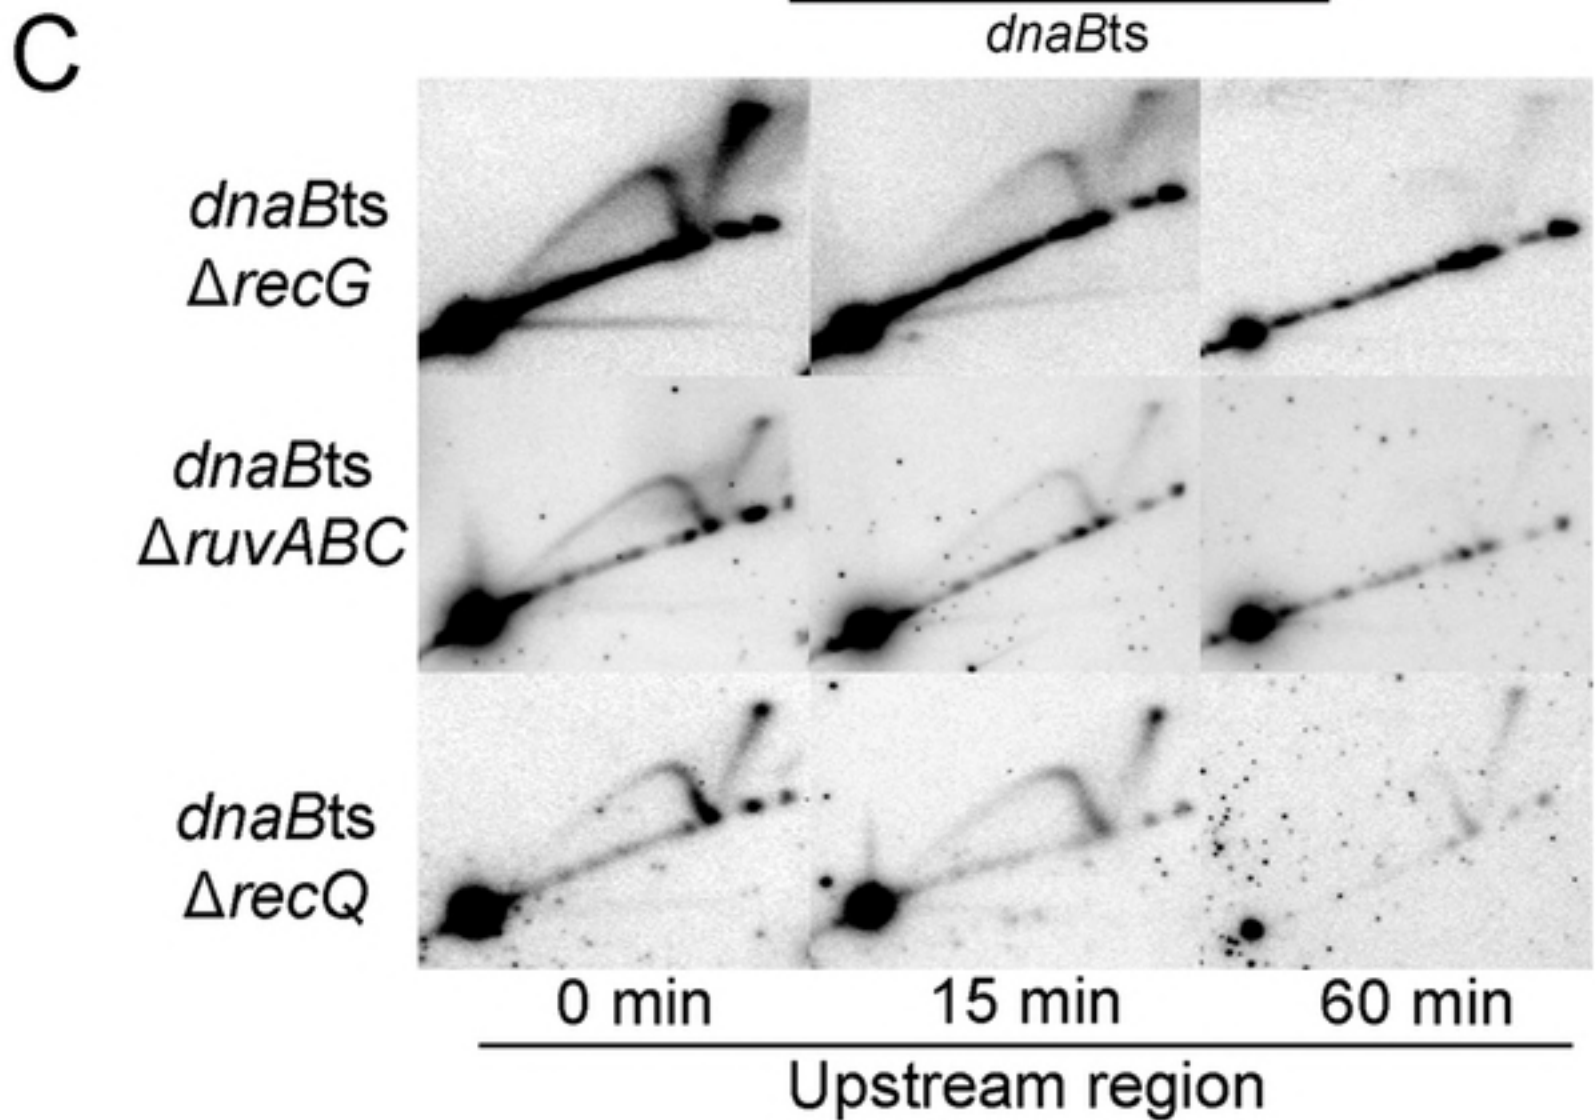

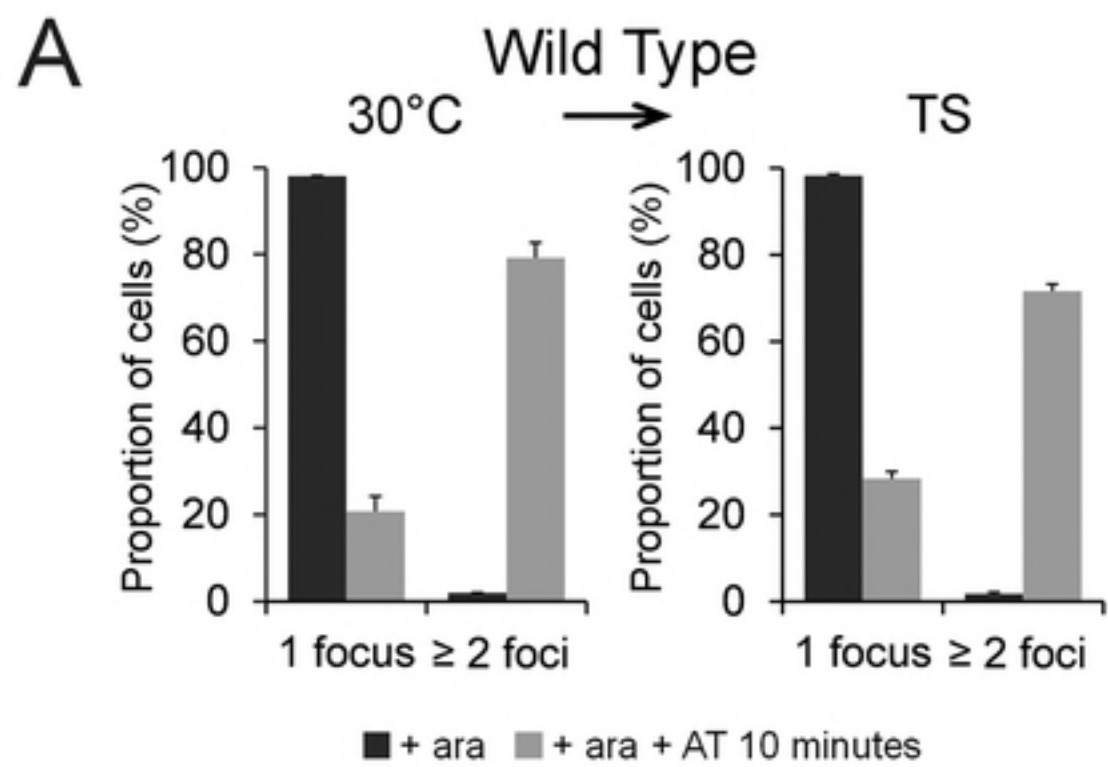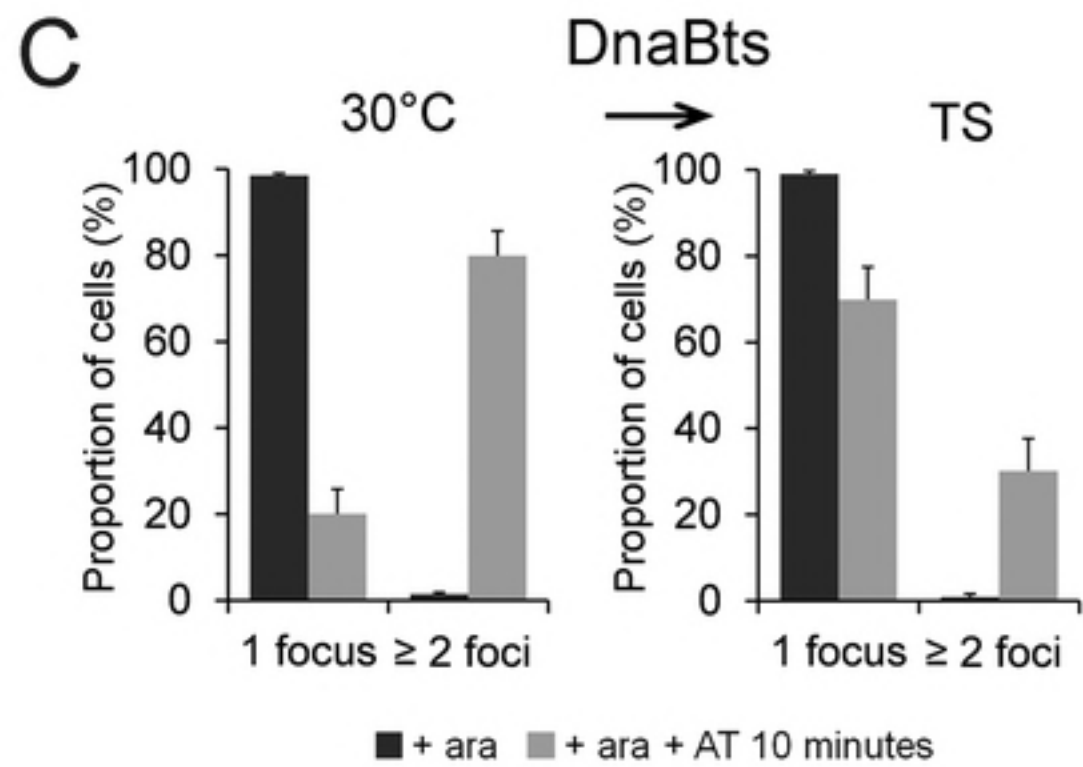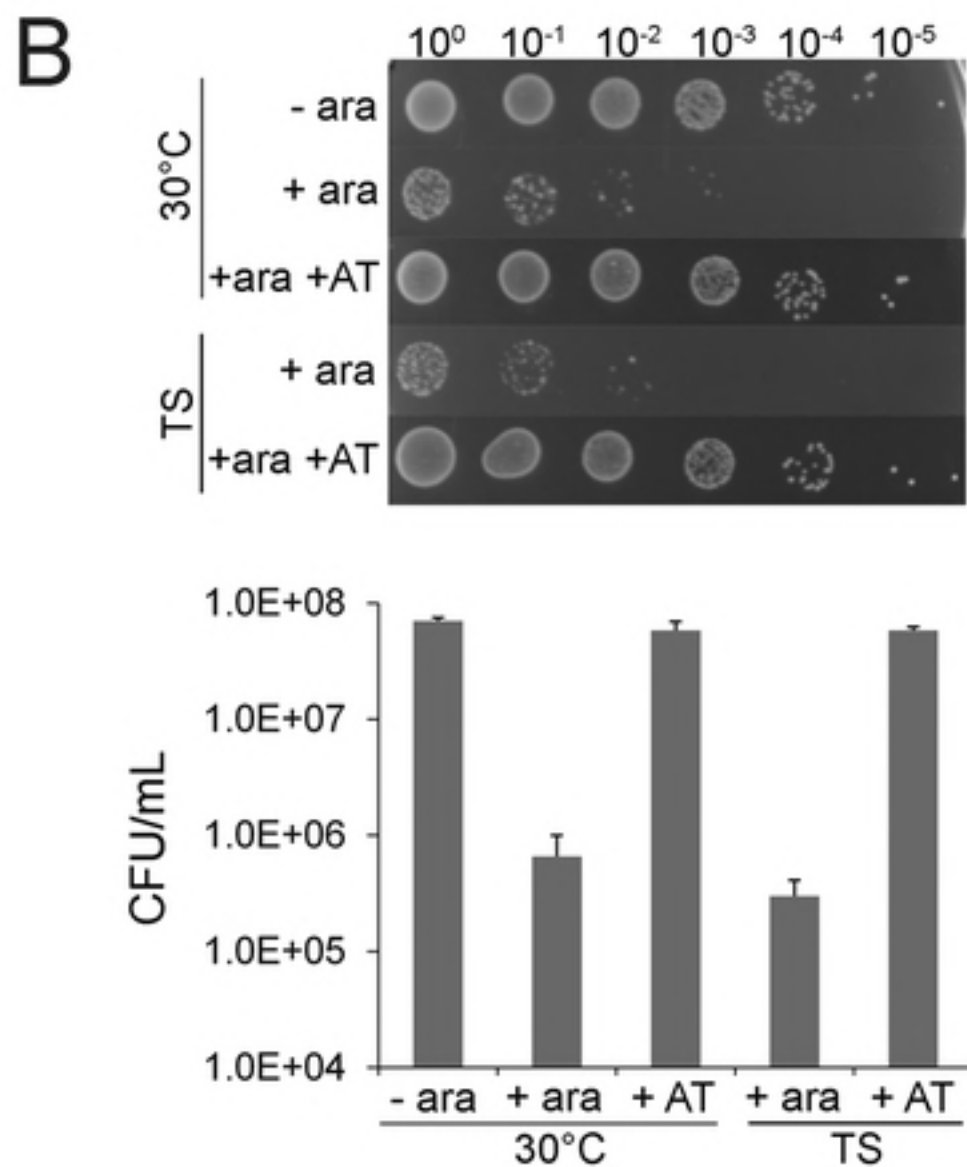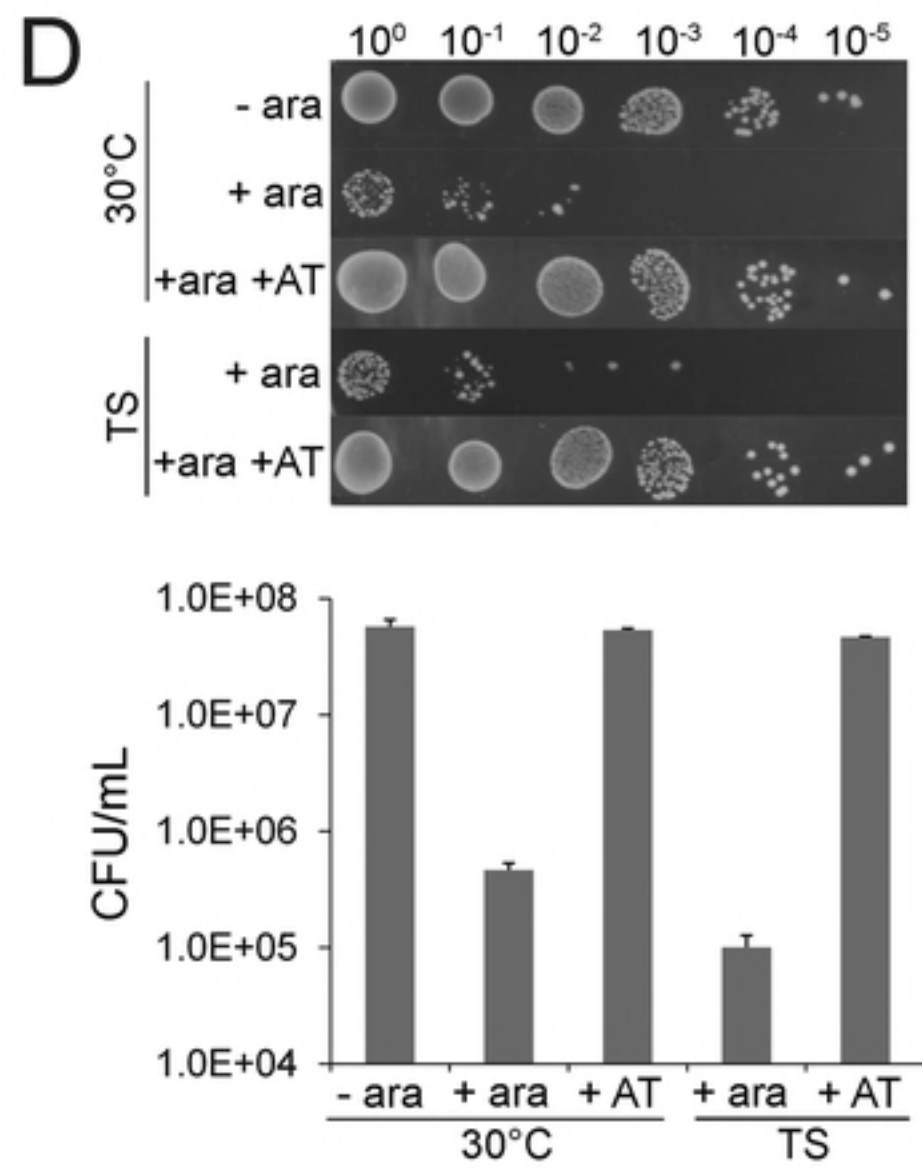

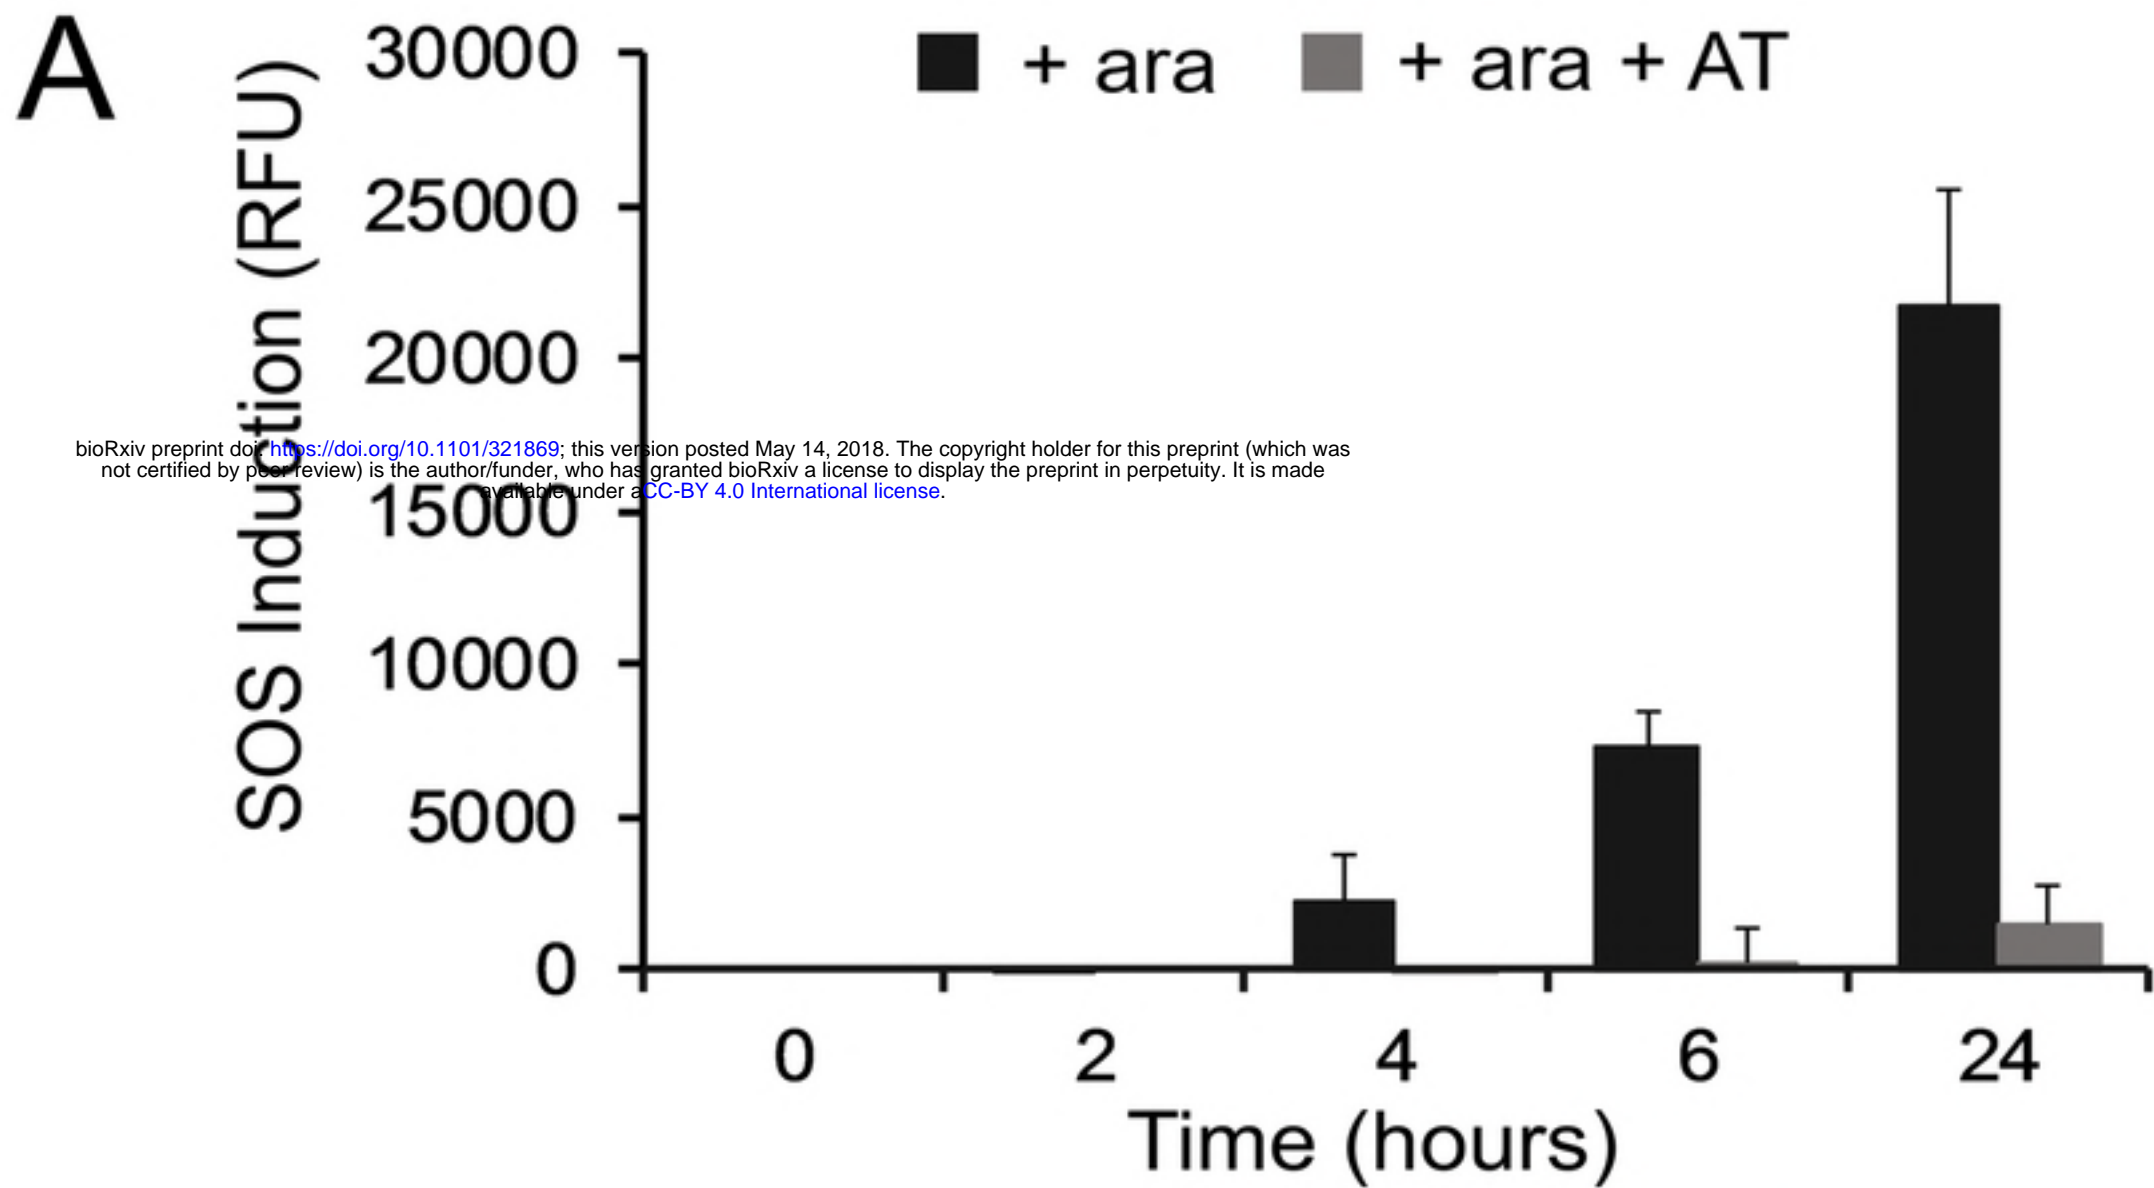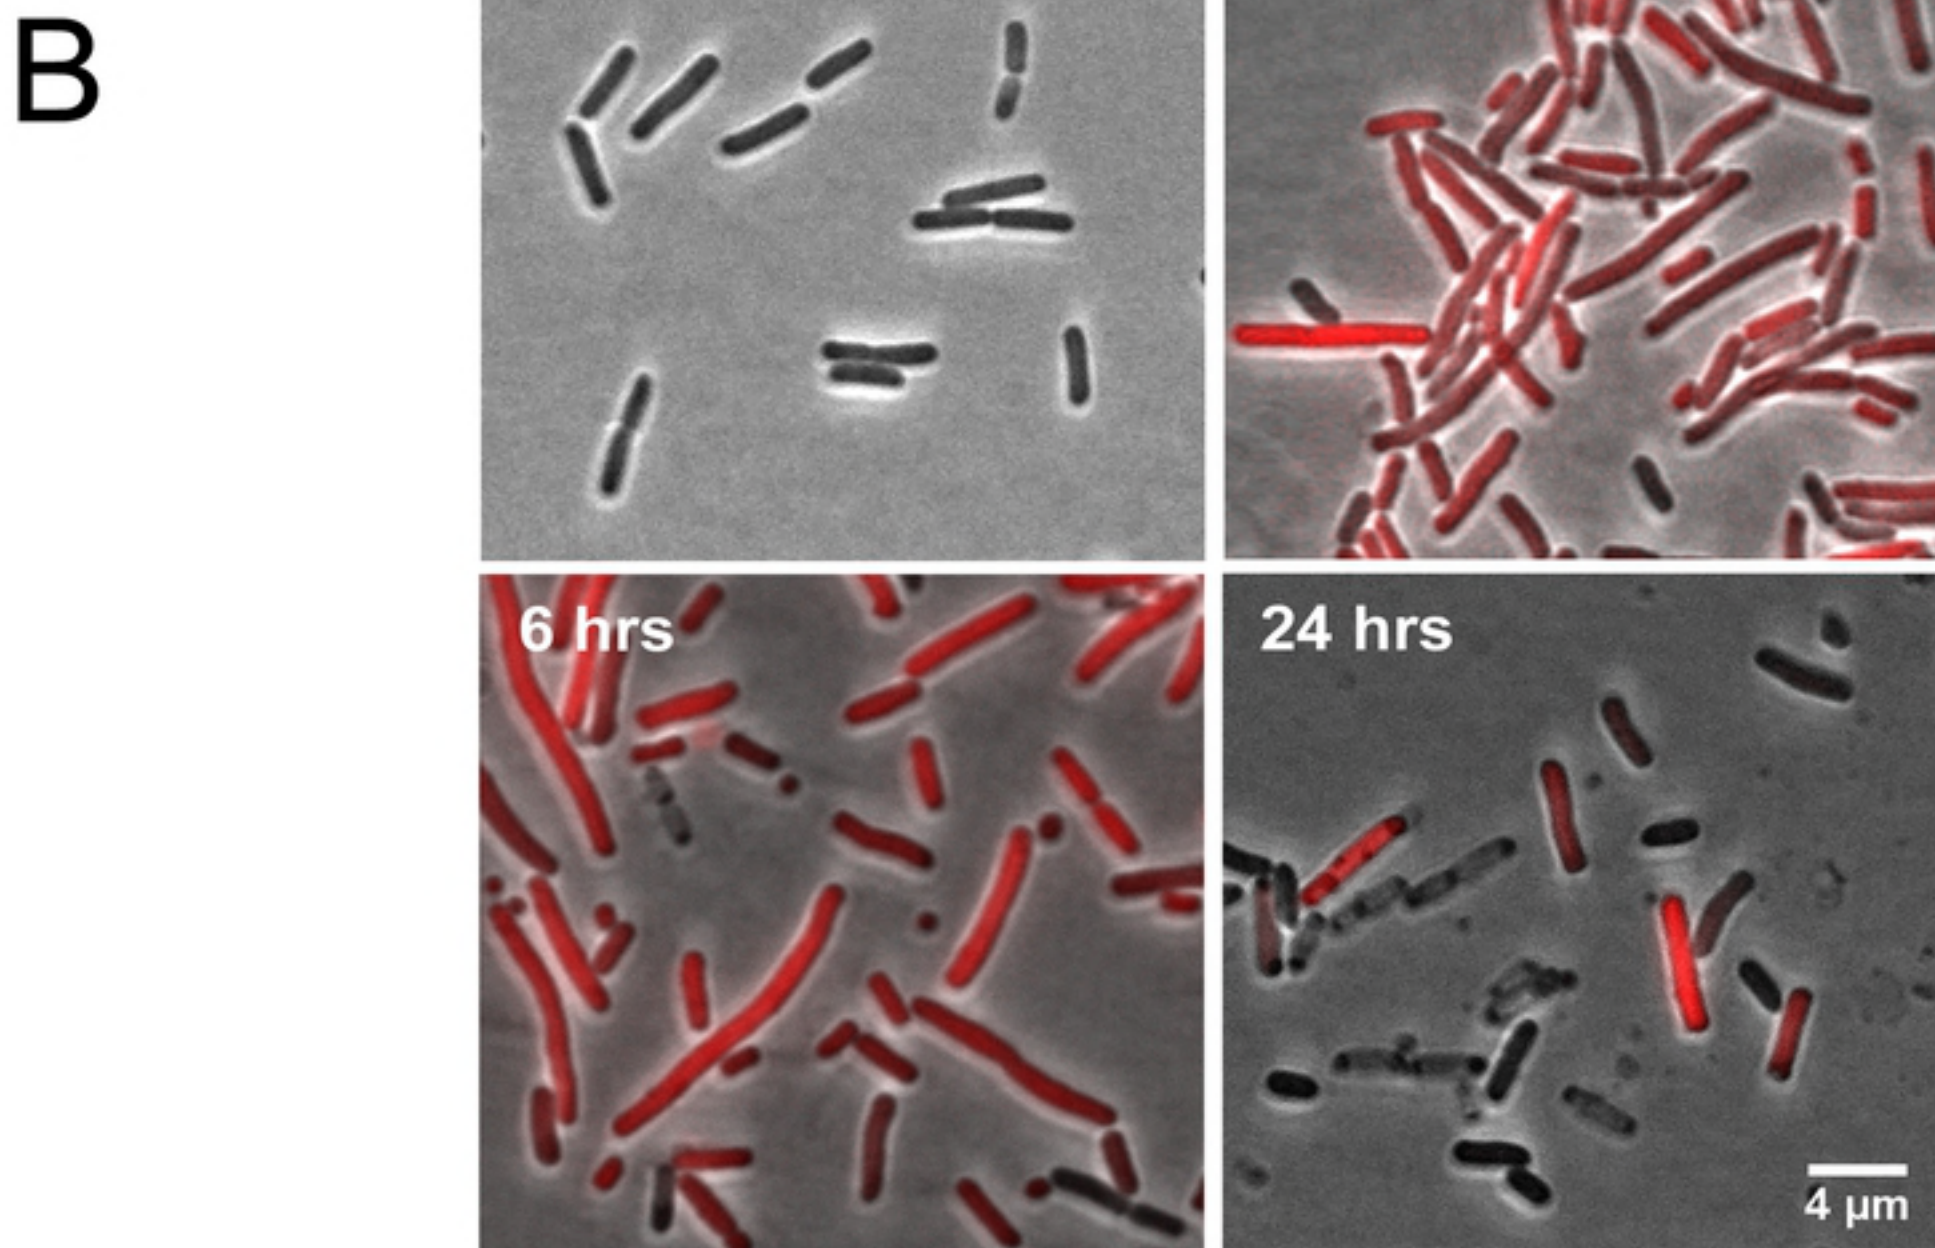



**A***dnaBts*  
 $\Delta recG\Delta recQ$ *dnaBts*  
 $\Delta recQ\Delta ruvABC$ *dnaBts*  
 $\Delta recG\Delta ruvABC$ 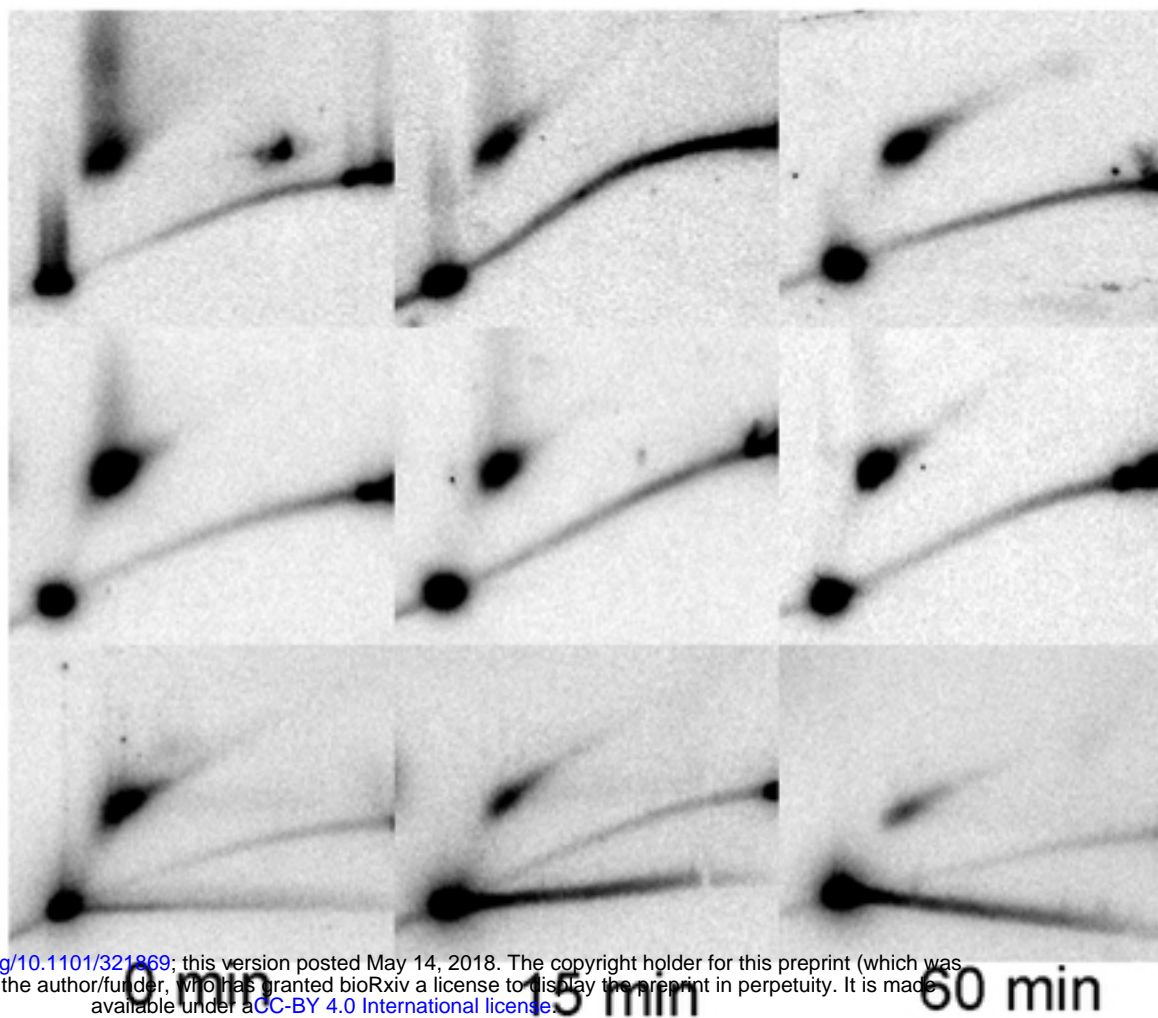

bioRxiv preprint doi: <https://doi.org/10.1101/321869>; this version posted May 14, 2018. The copyright holder for this preprint (which was not certified by peer review) is the author/funder, who has granted bioRxiv a license to display the preprint in perpetuity. It is made available under aCC-BY 4.0 International license.

**B**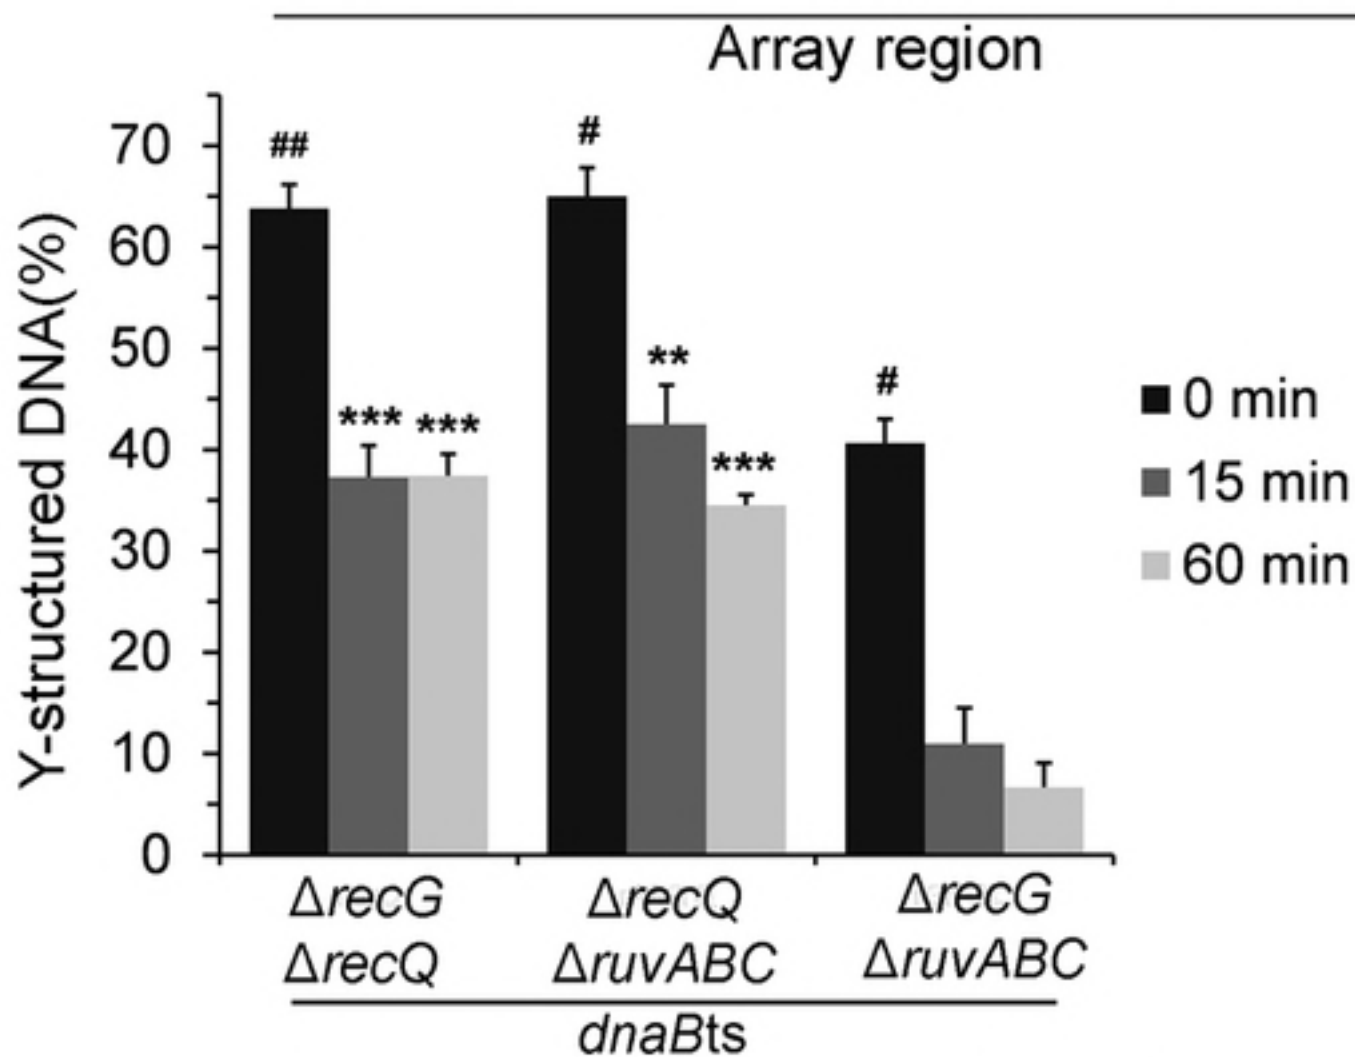**C***dnaBts*  
 $\Delta recG\Delta recQ$ *dnaBts*  
 $\Delta recQ\Delta ruvABC$ *dnaBts*  
 $\Delta recG\Delta ruvABC$ 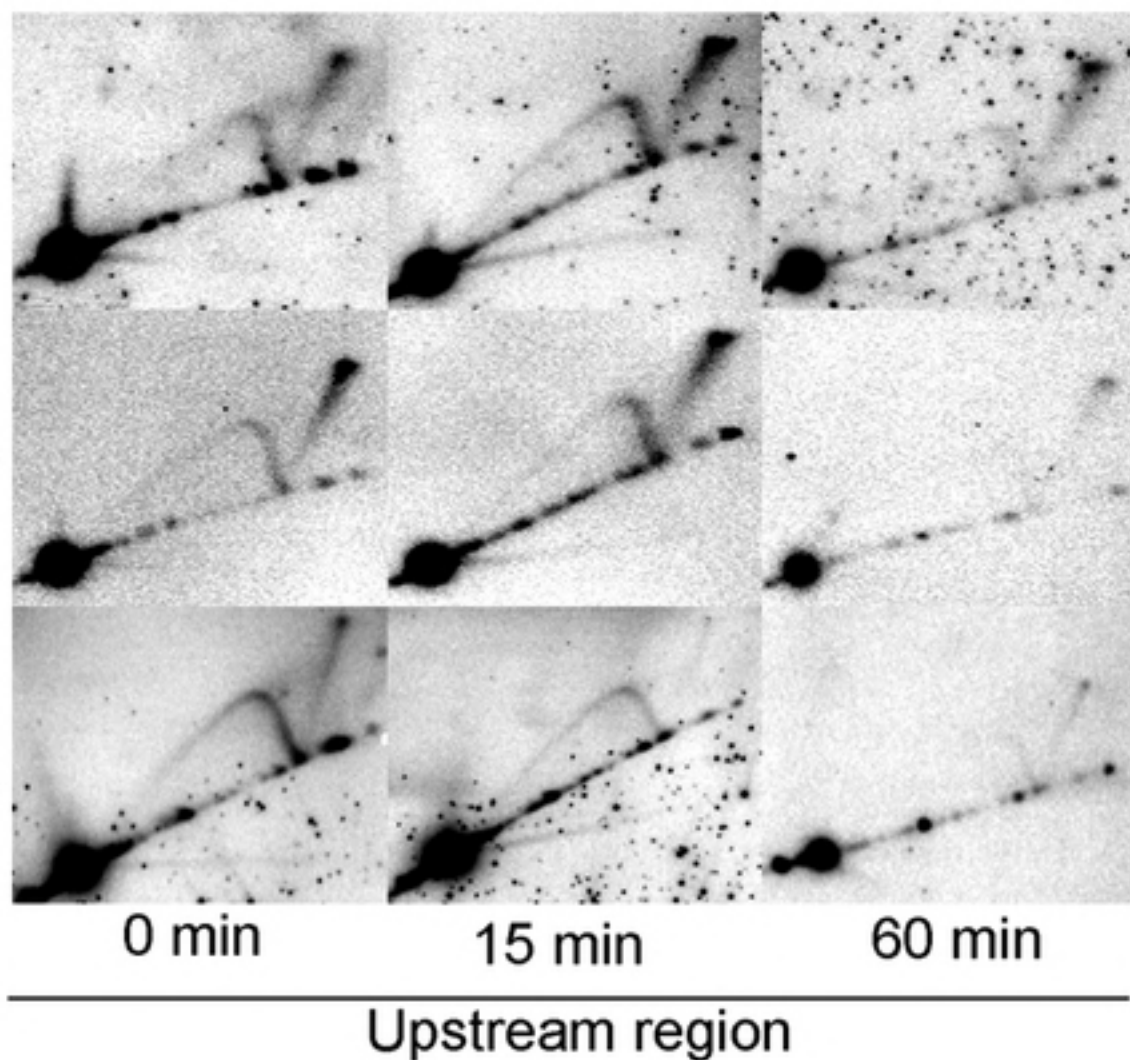

Array  
region

Upstream  
region

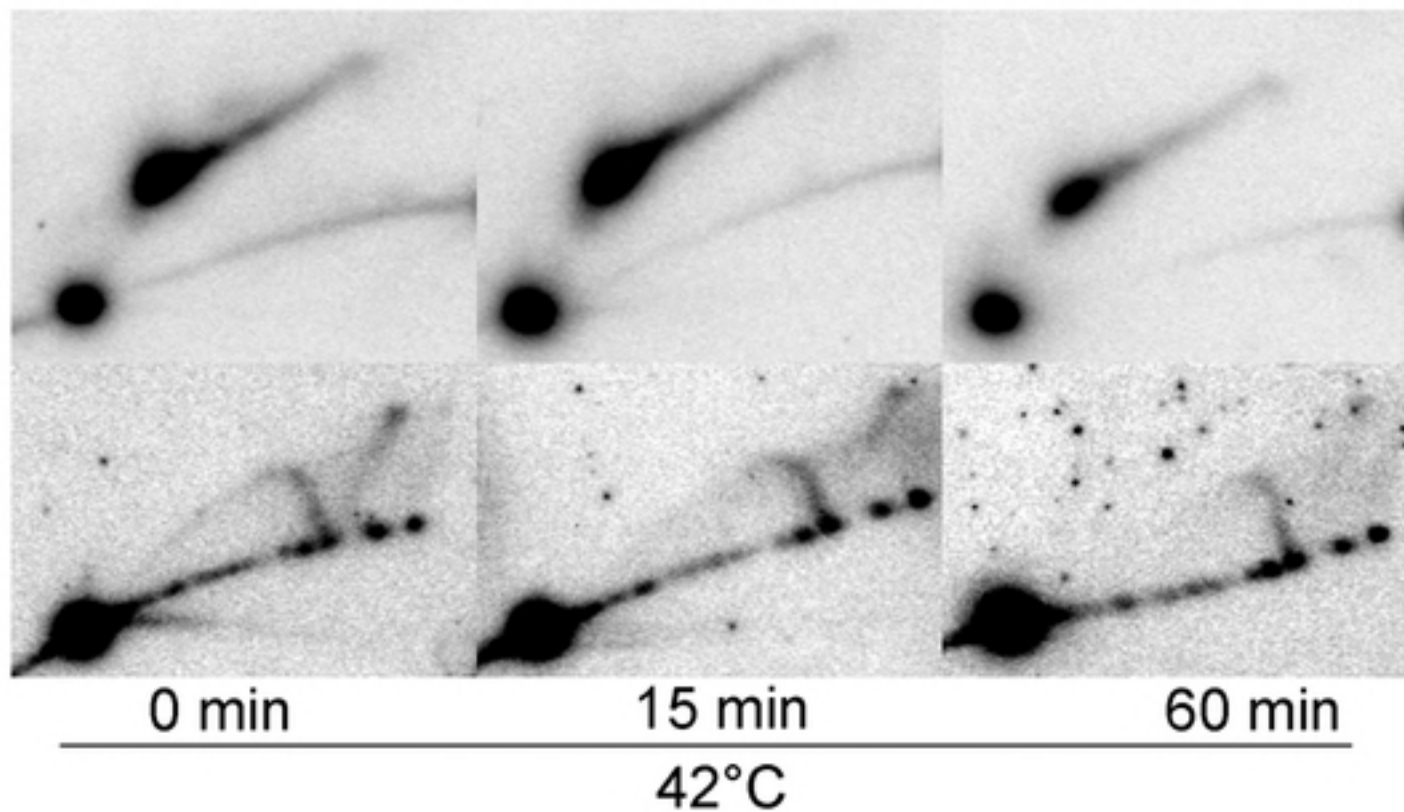

Y-structured DNA (%)

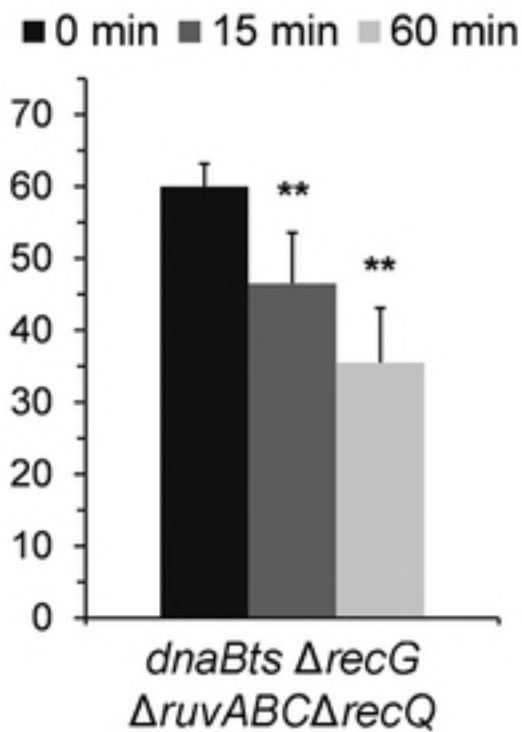

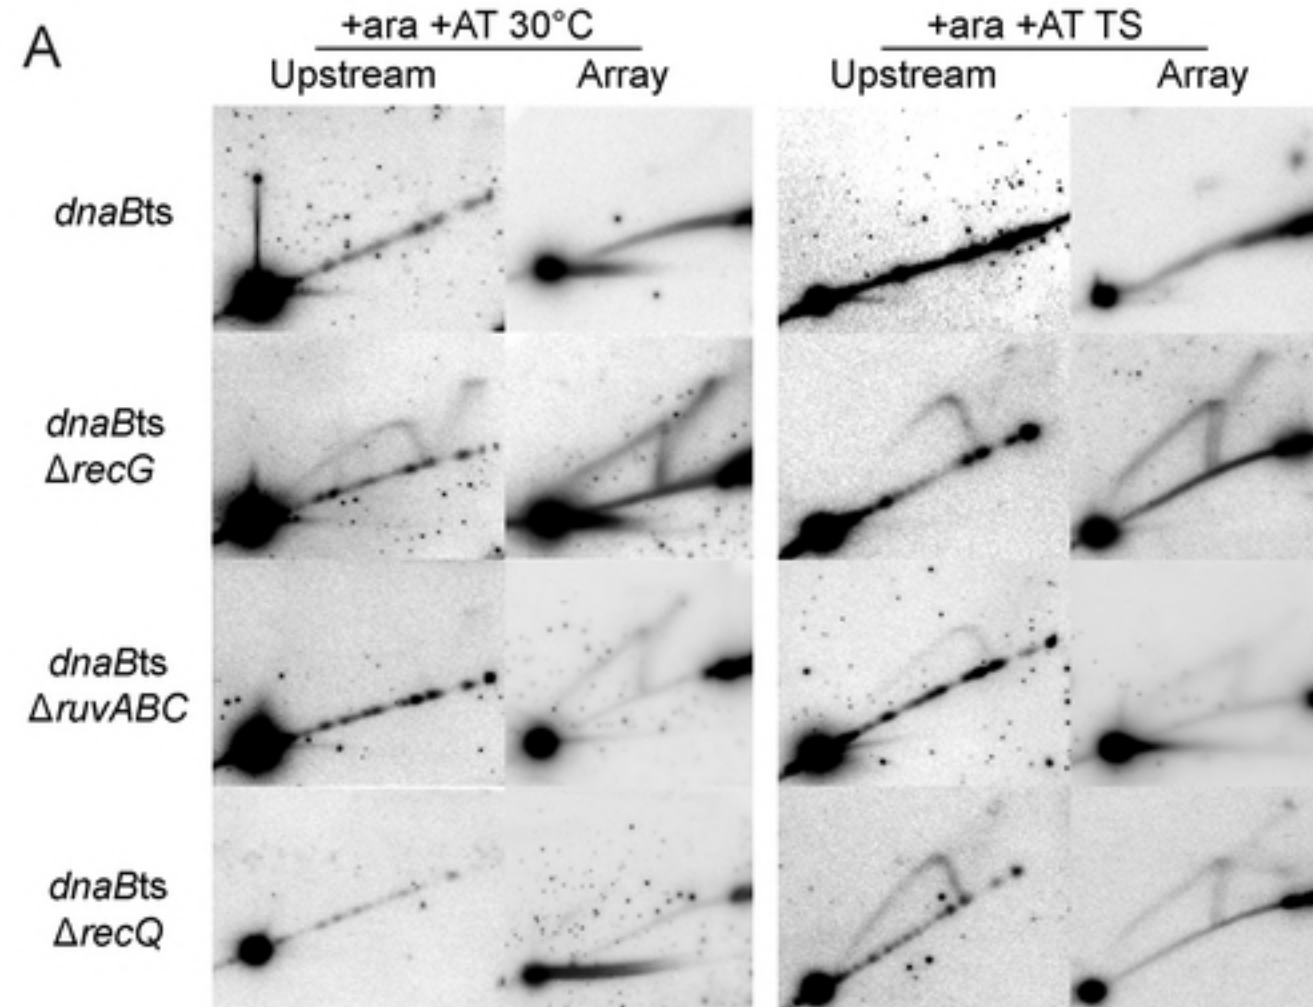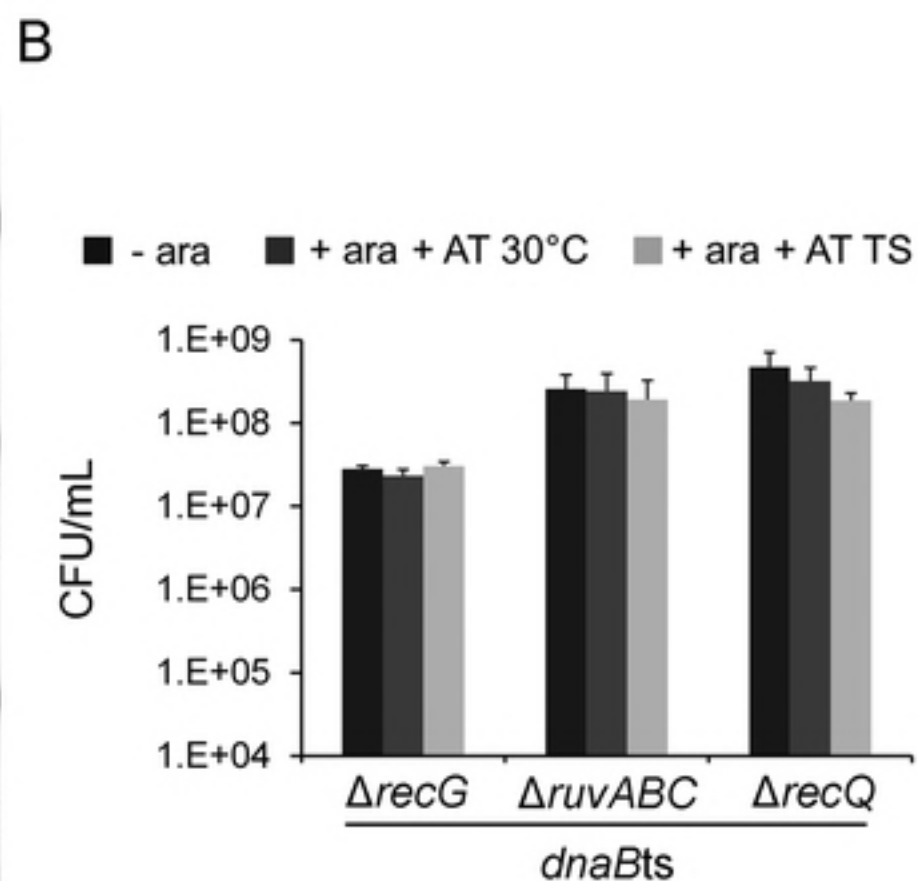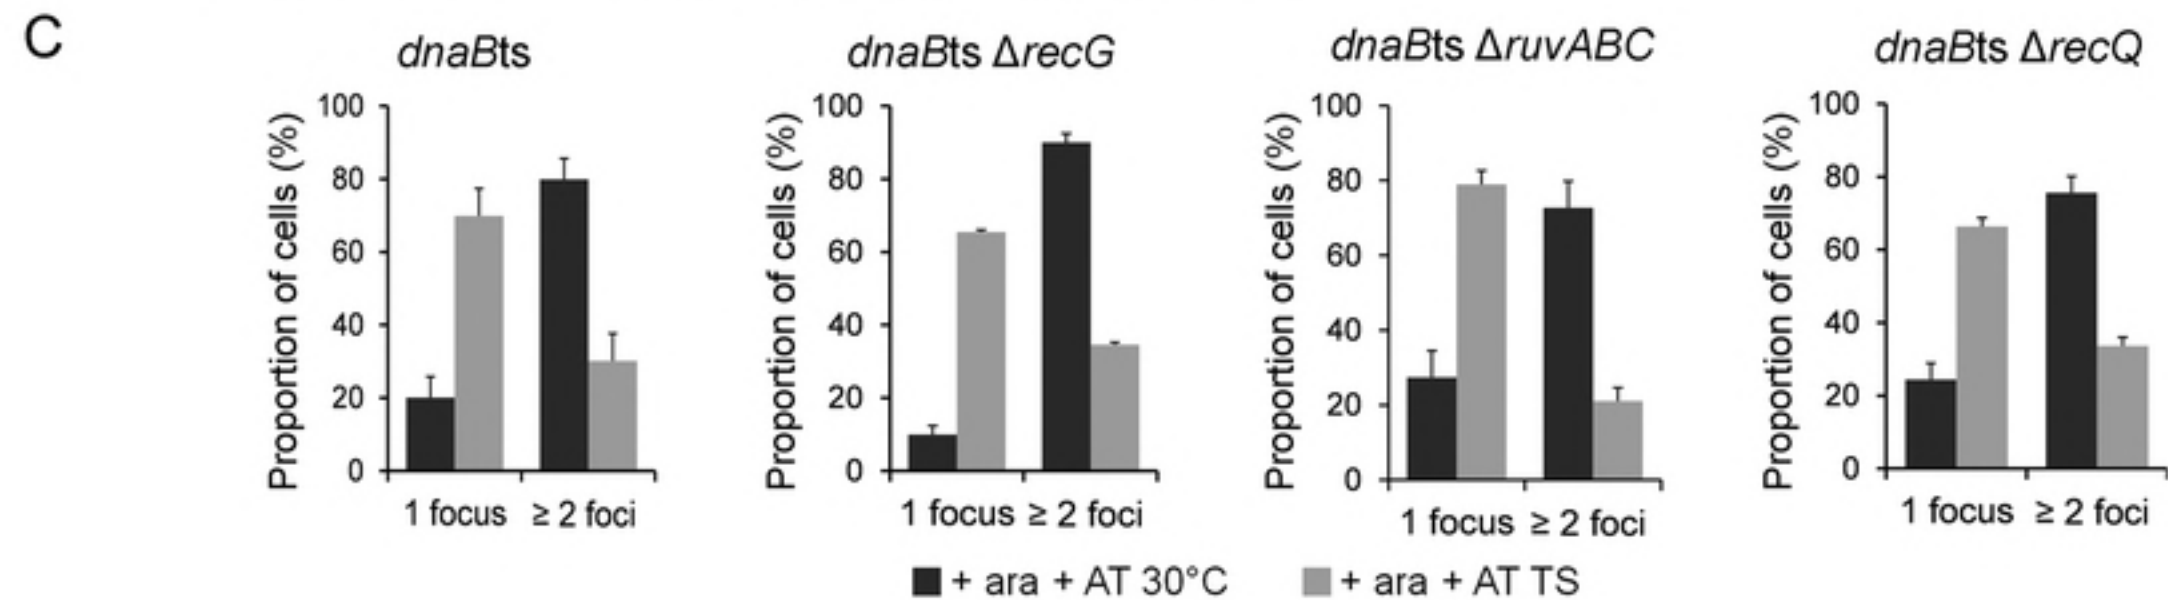

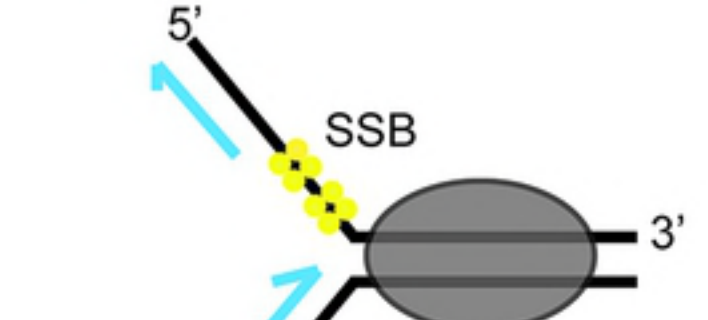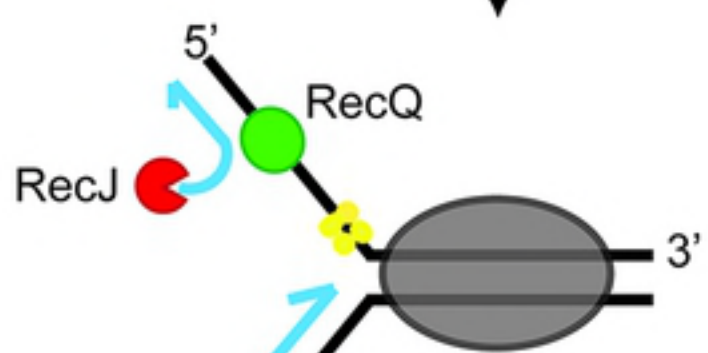

bioRxiv preprint doi: <https://doi.org/10.1101/321869>; this version posted May 14, 2018. The copyright holder for this preprint (which was not certified by peer review) is the author/funder, who has granted bioRxiv a license to display the preprint in perpetuity. It is made available under aCC-BY 4.0 International license.

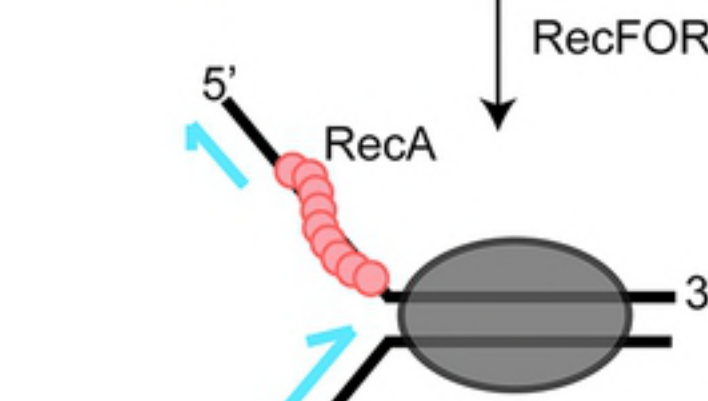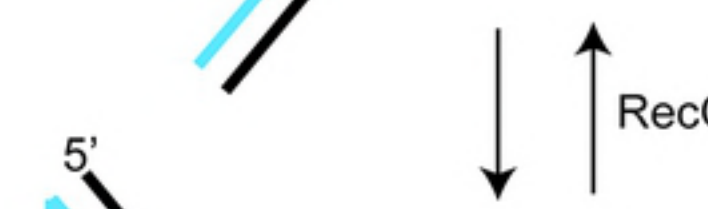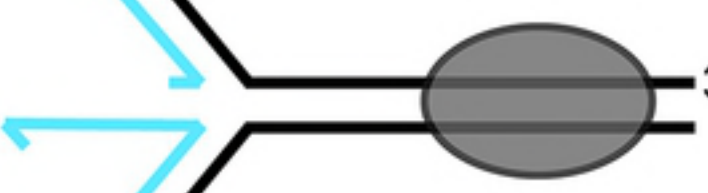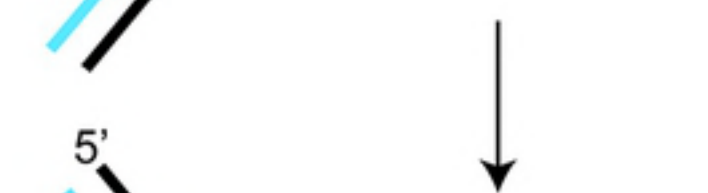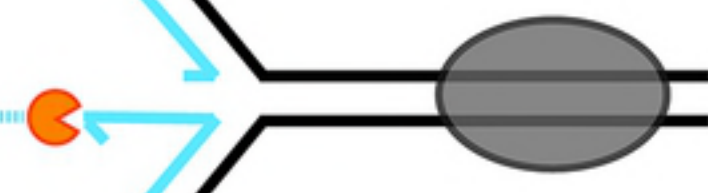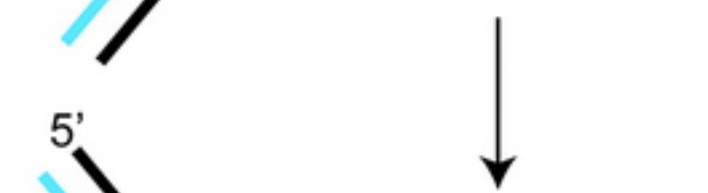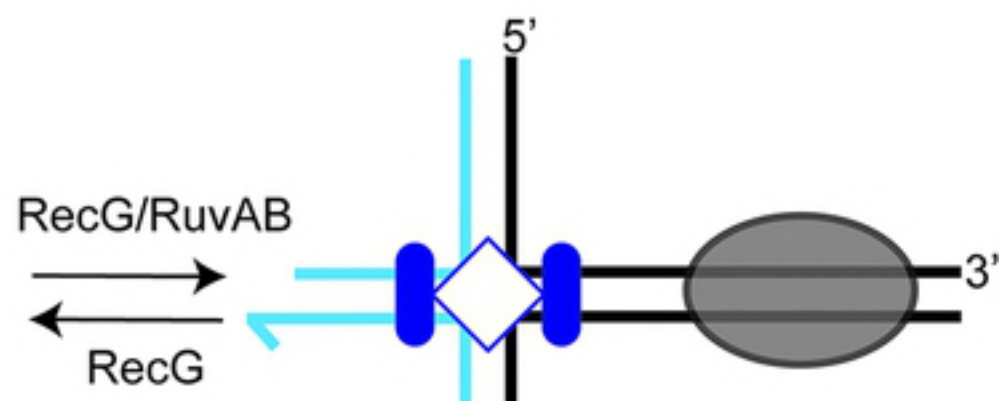

ExoI/  
SbcCD

RecBCD
